# Supplementary material for: Effect of Aircraft-Cabin Altitude on Passenger Discomfort
Source: Atypon-hosted journal article supplement (doi:10.1056/nejmoa062770), 2007-07-04
Supplement: nejm_muhm_18sa1.pdf [file nejm_muhm_18sa1.pdf]

## Supplementary Appendix

This appendix has been provided by the authors to give readers additional information about their work.

Supplement to: Muhm JM, Rock PB, McMullin DL, et al. Effect of aircraft-cabin altitude on passenger discomfort. N Engl J Med 2007;357:18-27.

*Effect of Commercial Aircraft Cabin Altitude on Passenger Discomfort*

*Supplementary Appendix*

1. J. Michael Muhm, M.D., M.P.H.  
Associate Technical Fellow  
Boeing Medical  
PO Box 3707 MC 7H-90  
The Boeing Company  
Seattle, Washington 98124-2207  
425 865 1062  
Mike.muhm@boeing.com  
Corresponding author
2. Paul B. Rock, D.O., Ph.D.  
Associate Professor of Medicine  
Center for Aerospace and Hyperbaric  
Medicine  
Oklahoma State University Center for  
Health Sciences
3. Dianne L. McMullin, Ph.D.  
Human Factors Specialist  
The Boeing Company
4. Stephen P. Jones, Ph.D.  
Associate Technical Fellow  
Applied Statistics  
The Boeing Company
5. I-Li Lu, Ph.D.  
Associate Technical Fellow  
Applied Statistics  
The Boeing Company
6. Kyle D. Eilers  
Lead Engineer  
Cabin Pressure Control Systems  
Environmental Control Systems  
The Boeing Company
7. David R. Space  
Associate Technical Fellow  
Environmental Control Systems  
The Boeing Company
8. Aleksandra McMullen, MS  
Lead Engineer  
Environmental Control Systems  
The Boeing Company

## Table of Contents

### *Effect of Commercial Aircraft Cabin Altitude on Passenger Discomfort*

#### *Supplementary Appendix*

#### **Methods**

|                                                                                   |    |
|-----------------------------------------------------------------------------------|----|
| Test Conditions                                                                   | 3  |
| Point Prevalence and Cumulative Prevalence                                        | 3  |
| Time Dependent Criterion Scores                                                   | 3  |
| Post-hoc Symptom-by-Symptom Analysis                                              | 5  |
| Tables and Figures                                                                |    |
| Table MI. Disqualifying Conditions                                                | 6  |
| Table MII. ESQ-IV Questionnaire                                                   | 7  |
| Table MIII. Symptom Weights for ESQ-IV Factor Scores                              | 9  |
| Table MIV. Summary Statistics for AMS-Cerebral and AMS-Respiratory at 650 feet    | 10 |
| Table MV. Time-dependent Criterion Scores for ESQ-IV Factors                      | 10 |
| Table MVI. AMS-Respiratory Factor Scores for Four Hypothetical Volunteers         | 11 |
| Table MVII. Tests of Sensory and Psychomotor Performance                          | 12 |
| Figure M1. Altitude Selection Algorithm                                           | 13 |
| Figure M2. Distributions of AMS-Cerebral Scores for the 650 foot Group by Hour    | 14 |
| Figure M3. Distributions of AMS-Respiratory Scores for the 650 foot Group by Hour | 15 |
| Figure M4. AMS-Respiratory Factor Scores for Four Hypothetical Participants       | 16 |

#### **Results**

|                                                                                                                               |    |
|-------------------------------------------------------------------------------------------------------------------------------|----|
| Tables and Figures                                                                                                            |    |
| Table RI. Chamber environmental parameters                                                                                    | 17 |
| Table RII. Preexercise SaO <sub>2</sub> in Exercising and Sedentary Groups                                                    | 18 |
| Table RIII. Summary of Log Rank Analyses of Cumulative Prevalence Using Time Dependent Criterion Scores                       | 19 |
| Table RIV. Summary of Analyses of Point Prevalence of ESQ-IV Factors                                                          | 20 |
| Table RV. Summary of Log Rank and Cox Proportional Hazards Analyses of Cumulative Prevalence Using Published Criterion Scores | 21 |
| Table RVI. Post-Hoc Analysis of Items Significantly Related to Altitude                                                       | 22 |
| Table RVII. Sensory and Psychomotor Performance Measures                                                                      | 23 |
| Figure R1. SaO <sub>2</sub> vs time. Box and Whisker Plot                                                                     | 26 |
| Figure R2. Point Prevalence, Published Criterion Scores                                                                       | 27 |
| Figure R3. Point Prevalence, Time Dependent Criterion Scores                                                                  | 28 |
| Figure R4. Cumulative Prevalence, Published Criterion Scores                                                                  | 29 |
| Figure R5. Cumulative Prevalence, Time Dependent Criterion Scores by Age Group                                                | 30 |

## Test Conditions

The study was conducted in a hypobaric chamber manufactured by C.G.S. Scientific Corporation which had an airlock that allowed ingress and egress of personnel and supplies without affecting the altitude in the main chamber. Twelve coach-class airplane seats spaced 34 inches from seat back to seat back (typical United States domestic commercial aircraft seat spacing is 28 - 35 inches, with most at 31 inches.), 2 video monitors and an exercise treadmill were installed in the 8 feet wide x 7 feet high x 20 feet long (2.4 m x 2.1 m x 6.1 m) main section of the chamber. The airplane seats served as sleeping space. Toilet facilities were provided. Ventilation was maintained at 10 cubic feet / minute / occupant (0.283 cubic meters / minute / occupant) at all altitudes using conditioned air from the building housing the chamber.

## Point Prevalence and Cumulative Prevalence

Criterion scores have been established to assist in interpreting the results of the computed ESQ-IV factor scores of a volunteer (see below). We considered a volunteer to have experienced the factor at hour  $t$  if the factor score for that factor was larger than its corresponding criterion score at hour  $t$ . The **point prevalence** for the symptom at hour  $t$  is the proportion of volunteers who experienced the symptom *at* hour  $t$ . The **cumulative prevalence** for the symptom at hour  $t$  is the proportion of volunteers who had experienced the symptom *by* hour  $t$ . Once a volunteer had a score greater than the criterion score for a factor, he was considered a "case" in the determination of cumulative prevalence at all subsequent hours even if his score dropped below the criterion score for the subsequent hours.

## Time Dependent Criterion Scores

The Environmental Symptom Questionnaire IV (ESQ-IV) is a validated survey consisting of 68 symptoms, (Table MII).<sup>19</sup> Each symptom was scored 0 if the respondent did not have the symptom and on a scale of 1 to 5 if the symptom was present, with 1 = Slight, 2 = Somewhat, 3 = Moderate, 4 = Quite a bit, and 5 = Extreme. Factor scores were calculated using published symptom weights (Table MIII).<sup>19</sup> Note that for the Alert factor, symptoms 56, 57, 58, 59 and 65 were placed on a reverse scale by subtracting the symptom score from 5. These new variables are called 56r, 57r, 58r, 59r and 65r.

Sampson *et. al.* published criterion scores for AMS-C or AMS-R, specifically  $AMS-C > 0.7$  and  $AMS-R > 0.6$ , which are used to separate "noise" from "signal" in the factor scores calculated from responses to the ESQ-IV.<sup>19</sup> These criterion scores are independent of the number of hours of exposure to altitude the volunteers had experienced.

Figures M2 and M3 of Supplementary Appendix: Methods display the distributions of the AMS-C and AMS-R scores at different times during the simulated 20-hour flight at ground level (650 feet). From these figures and the summary statistics in Supplementary Appendix: Methods Table MIV it appears that both the mean and the variance of factor scores increase over time. Thus the distributions of AMS-C or AMS-R scores appeared to depend on the number of hours of the 20-hour simulated flight that the volunteers had experienced.

Similar patterns were observed for the distributions of scores for AMS-C and AMS-R at the other altitudes, suggesting that the assumption that AMS-C and AMS-R criterion scores are independent of time might not be valid for the altitudes and exposure time investigated. This observation suggests the need for developing factor criterion scores that are time-dependent.

Since altitude-related symptoms occur only when a volunteer is exposed to an altitude to which she/he is not acclimatized, it is reasonable to classify the factor scores from volunteers at the altitude at which they reside, which in this study was 650 feet above sea level, as being due to noise. In our data, there are two sets of these scores: those calculated from all 502 volunteers prior to depressurizing the chamber; and those calculated from the 103 passengers at the ground level altitude group (650 feet) during the 20-hour simulated flight.

The following rules were used to define the time-dependent criterion for all ESQ-IV factors at each hour of exposure.

- i. Determine the 97.5<sup>th</sup> percentile of the factor scores prior to depressurizing the chamber as follows:
  - a. Calculate the 502 scores for each factor from the ESQ-IV administered prior to depressurizing the chamber.
  - b. Exclude from this set of scores any volunteer with outlier responses (AMS-C > 1.5, AMS-R > 1.5).
  - c. Determine the 97.5<sup>th</sup> percentile of the remaining factor scores.
- ii. Determine the 97.5<sup>th</sup> percentile of the factor scores for hour  $t$  ( $t = 1, 3, 5, 7, 9, 11, 13, 19, 20, 21$ ) as follows:
  - a. Calculate the 103 scores for each factor from the ESQ-IV administered at ground level altitude (650 feet) at hour  $t$ .
  - b. Exclude from this set of scores any volunteer with outlier responses (AMS-C > 1.5, AMS-R > 1.5)
  - c. For each hour  $t$ , determine the 97.5<sup>th</sup> percentile of the factor scores
- iii. Define the criterion score at hour  $t$  to be the larger of the 97.5<sup>th</sup> percentile from hour 0 and the 97.5<sup>th</sup> percentile from the  $t^{\text{th}}$  hour.

Defining criterion scores in this way introduces a time-dependency that improves our ability to distinguish the effects of exposure to altitude from those of unidentified time-related stressors associated with being in the chamber. The outlier exclusion criteria resulted in the exclusion of a single factor score in hour 5 and in hour 19.

Supplementary Appendix: Methods Tables MIV gives relevant statistics for AMS-C, and MV the resulting time-dependent criterion scores for AMS-C and all other ESQ-IV factors. We see that the 97.5<sup>th</sup> percentile of the 502 scores from hour 0 is 0.432. Up to and including hour 7, the 97.5<sup>th</sup> percentile at 650 feet for the  $t^{\text{th}}$  hour is less than 0.432 and so, up to and including hour 7 the time-dependent criterion for AMS-C is 0.432. Beyond hour 7, the 97.5<sup>th</sup> percentile at 650 feet for the  $t^{\text{th}}$  hour is greater than 0.432 and so beyond hour 7 the time-dependent criterion is 97.5<sup>th</sup> percentile at 650 feet for hour  $t$ .

We considered alternative noise exclusion levels to that of 97.5% described above. A rationale for using the 97.5% noise exclusion level as opposed to some other noise exclusion level is that at the mid-flight period (hours 9 and 11) the criteria for AMS-C and AMS-R are similar to the published criteria of Sampson *et. al.*<sup>19</sup>

To illustrate the calculation of cumulative prevalence, suppose that we have the AMS-R factor scores for four hypothetical volunteers in Supplementary Appendix: Methods Table MVI. The data, including the time-dependent criterion are plotted in Supplementary Appendix: Methods Figure M4. We see that at hour 3, volunteer B's factor score exceeded the criterion of 0.402. At hours 5 and 7, the factor scores for both A and B exceeded the appropriate time-dependent criterion. At hour 9 the factor score for volunteer B no longer exceeded the hour 9 criterion. So at hour 9, the point prevalence is based on only one volunteer since only one volunteer (A) exceeds the hour 9 criterion, but the cumulative prevalence is based on two volunteers since two volunteers (A and B) had exceeded a time-dependent criterion by hour 9. The point and the cumulative prevalence by hour are given in the last two columns of Supplementary Appendix: Methods Table MVII. Over the course of the 20-hour exposure three of the volunteers exceeded at least one time-dependent criterion and so the cumulative prevalence is based on three volunteers.

### **Post-hoc Symptom-by-Symptom Analysis**

A post-hoc analysis of the symptom scores was conducted to look at the effect of altitude on the scores of the individual symptoms. The objective of this analysis was to examine which symptoms might be the important contributors to any observed significant effect that altitude has on factor scores. The weights in Table MIII were used to combine individual symptoms to obtain an overall factor score. Consequently a symptom that is significantly affected by altitude might have a small effect on the factor score because the symptom has a low weight.

Ordered categorical data are frequently analyzed by fitting a standard regression-type model to scores that are applied to the categories. In this appendix we describe a method using a proportional odds model. This modeling approach depends on less restrictive assumptions.<sup>20</sup>

A separate proportional odds model was fit for each of the 68 ESQ symptoms and for each hour (hour=1, 3, 5, 7, 9, 11, 13, 19, 20). All models included terms for activity (sedentary vs. exercise), gender, age (young, middle-age, older) and altitude. Altitude was considered either a continuous covariate, in which case a test for slope was conducted, or a categorical covariate, in which case tests involving altitude contrasts of interest were conducted.

A crude measure of the contribution of each symptom to discomfort was developed by counting the number of times during the test session that the slope of the symptom or selected contrasts were significantly related to altitude and multiplying that number by the factor-specific weights of the symptom. These products were then summed over all the altitude-related factors to assess the contribution of that symptom to discomfort. The symptoms were then ranked from high to low by this sum of products and the highest ranked symptoms were considered to be important contributors. (Supplementary Appendix Methods: Table RIX)

**Table MI Disqualifying Conditions**

|                     |                                                                                                                                                                                                                                                                                                                                                                                               |                                                                                                                                                                                                                                                                                                                                                                                                                                                                    |
|---------------------|-----------------------------------------------------------------------------------------------------------------------------------------------------------------------------------------------------------------------------------------------------------------------------------------------------------------------------------------------------------------------------------------------|--------------------------------------------------------------------------------------------------------------------------------------------------------------------------------------------------------------------------------------------------------------------------------------------------------------------------------------------------------------------------------------------------------------------------------------------------------------------|
| Chronic Conditions† | <ul style="list-style-type: none"> <li>• COPD*</li> <li>• Asthma*</li> <li>• Restrictive Lung Diseases*</li> <li>• Coronary Artery Disease*</li> <li>• Arrhythmia*</li> <li>• Congestive Heart Failure*</li> <li>• Cerebrovascular accident</li> <li>• Lower Extremity DVT</li> <li>• Diabetes mellitus, poorly controlled (change in medication doseage/ frequency in past month)</li> </ul> | <ul style="list-style-type: none"> <li>• Seizure within past 6 months.</li> <li>• Claustrophobia that would impair chamber participation</li> <li>• Musculoskeletal disorder that impairs self care and self locomotion.</li> <li>• Current anemia of any cause</li> <li>• Sickle Cell Trait</li> <li>• Other conditions, which, in the opinion of the Principal Investigator, might result in excessive risk upon exposure to a hypobaric environment.</li> </ul> |
| Acute Conditions‡   | <ul style="list-style-type: none"> <li>• Contagious disease (including upper respiratory illness)</li> <li>• Pregnancy</li> <li>• Within 4 weeks of a major surgical procedure.</li> <li>• Dental abscesses</li> </ul>                                                                                                                                                                        | <ul style="list-style-type: none"> <li>• Scuba diving within 24 hours of test</li> <li>• Donated blood within 24 hours of test</li> <li>• Under the influence of drugs or alcohol</li> </ul>                                                                                                                                                                                                                                                                       |

\* If AMS Disability Class III or worse

† Screening was conducted during orientation session days to weeks before study session.

‡ Screening was conducted morning of study session

**Table MII. ESQ-IV Questionnaire<sup>19</sup>**

|     |                                           | <b>Not at All</b> | <b>Slight</b> | <b>Some-what</b> | <b>Moderate</b> | <b>Quite a bit</b> | <b>Extreme</b> |
|-----|-------------------------------------------|-------------------|---------------|------------------|-----------------|--------------------|----------------|
| 1.  | I felt lightheaded.....                   | 0                 | 1             | 2                | 3               | 4                  | 5              |
| 2.  | I had a headache.....                     | 0                 | 1             | 2                | 3               | 4                  | 5              |
| 3.  | I felt sinus pressure.....                | 0                 | 1             | 2                | 3               | 4                  | 5              |
| 4.  | I felt dizzy.....                         | 0                 | 1             | 2                | 3               | 4                  | 5              |
| 5.  | I felt faint.....                         | 0                 | 1             | 2                | 3               | 4                  | 5              |
| 6.  | My vision was dim.....                    | 0                 | 1             | 2                | 3               | 4                  | 5              |
| 7.  | My coordination was off.....              | 0                 | 1             | 2                | 3               | 4                  | 5              |
| 8.  | I was short of breath.....                | 0                 | 1             | 2                | 3               | 4                  | 5              |
| 9.  | It was hard to breathe.....               | 0                 | 1             | 2                | 3               | 4                  | 5              |
| 10. | It hurt to breathe.....                   | 0                 | 1             | 2                | 3               | 4                  | 5              |
| 11. | My heart was beating fast.....            | 0                 | 1             | 2                | 3               | 4                  | 5              |
| 12. | My heart was pounding.....                | 0                 | 1             | 2                | 3               | 4                  | 5              |
| 13. | I had a chest pain.....                   | 0                 | 1             | 2                | 3               | 4                  | 5              |
| 14. | I had chest pressure.....                 | 0                 | 1             | 2                | 3               | 4                  | 5              |
| 15. | My hands were shaking or trembling.....   | 0                 | 1             | 2                | 3               | 4                  | 5              |
| 16. | I had a muscle cramp.....                 | 0                 | 1             | 2                | 3               | 4                  | 5              |
| 17. | I had stomach cramps.....                 | 0                 | 1             | 2                | 3               | 4                  | 5              |
| 18. | My muscles felt tight or stiff.....       | 0                 | 1             | 2                | 3               | 4                  | 5              |
| 19. | I felt weak.....                          | 0                 | 1             | 2                | 3               | 4                  | 5              |
| 20. | My legs or feet ached.....                | 0                 | 1             | 2                | 3               | 4                  | 5              |
| 21. | My hands, arms, or shoulders ached.....   | 0                 | 1             | 2                | 3               | 4                  | 5              |
| 22. | My back ached.....                        | 0                 | 1             | 2                | 3               | 4                  | 5              |
| 23. | I had a stomachache.....                  | 0                 | 1             | 2                | 3               | 4                  | 5              |
| 24. | I felt sick to my stomach (nauseous)..... | 0                 | 1             | 2                | 3               | 4                  | 5              |
| 25. | I had gas pressure.....                   | 0                 | 1             | 2                | 3               | 4                  | 5              |
| 26. | I had diarrhea.....                       | 0                 | 1             | 2                | 3               | 4                  | 5              |
| 27. | I felt constipated.....                   | 0                 | 1             | 2                | 3               | 4                  | 5              |
| 28. | I had to urinate more than usual.....     | 0                 | 1             | 2                | 3               | 4                  | 5              |
| 29. | I had to urinate less than usual.....     | 0                 | 1             | 2                | 3               | 4                  | 5              |
| 30. | I felt warm.....                          | 0                 | 1             | 2                | 3               | 4                  | 5              |
| 31. | I felt feverish.....                      | 0                 | 1             | 2                | 3               | 4                  | 5              |
| 32. | My feet were sweaty.....                  | 0                 | 1             | 2                | 3               | 4                  | 5              |
| 33. | I was sweating all over.....              | 0                 | 1             | 2                | 3               | 4                  | 5              |
| 34. | My hands were cold.....                   | 0                 | 1             | 2                | 3               | 4                  | 5              |

**Table MII. ESQ-IV Questionnaire<sup>19</sup>**

|     |                                         | <b>Not at All</b> | <b>Slight</b> | <b>Some-what</b> | <b>Moderate</b> | <b>Quite a bit</b> | <b>Extreme</b> |
|-----|-----------------------------------------|-------------------|---------------|------------------|-----------------|--------------------|----------------|
| 35. | My feet were cold.....                  | 0                 | 1             | 2                | 3               | 4                  | 5              |
| 36. | I felt chilly.....                      | 0                 | 1             | 2                | 3               | 4                  | 5              |
| 37. | I was shivering.....                    | 0                 | 1             | 2                | 3               | 4                  | 5              |
| 38. | Parts of my body felt numb.....         | 0                 | 1             | 2                | 3               | 4                  | 5              |
| 39. | My skin was burning or itchy.....       | 0                 | 1             | 2                | 3               | 4                  | 5              |
| 40. | My eyes felt irritated.....             | 0                 | 1             | 2                | 3               | 4                  | 5              |
| 41. | My vision was blurry.....               | 0                 | 1             | 2                | 3               | 4                  | 5              |
| 42. | My ears felt blocked up.....            | 0                 | 1             | 2                | 3               | 4                  | 5              |
| 43. | My ears ached.....                      | 0                 | 1             | 2                | 3               | 4                  | 5              |
| 44. | I couldn't hear well.....               | 0                 | 1             | 2                | 3               | 4                  | 5              |
| 45. | My ears were ringing.....               | 0                 | 1             | 2                | 3               | 4                  | 5              |
| 46. | My nose felt stuffed up.....            | 0                 | 1             | 2                | 3               | 4                  | 5              |
| 47. | I had a runny nose.....                 | 0                 | 1             | 2                | 3               | 4                  | 5              |
| 48. | I had a nose bleed.....                 | 0                 | 1             | 2                | 3               | 4                  | 5              |
| 49. | My mouth was dry.....                   | 0                 | 1             | 2                | 3               | 4                  | 5              |
| 50. | My throat was sore.....                 | 0                 | 1             | 2                | 3               | 4                  | 5              |
| 51. | I was coughing.....                     | 0                 | 1             | 2                | 3               | 4                  | 5              |
| 52. | I lost my appetite.....                 | 0                 | 1             | 2                | 3               | 4                  | 5              |
| 53. | I felt sick.....                        | 0                 | 1             | 2                | 3               | 4                  | 5              |
| 54. | I felt hungover.....                    | 0                 | 1             | 2                | 3               | 4                  | 5              |
| 55. | I was thirsty.....                      | 0                 | 1             | 2                | 3               | 4                  | 5              |
| 56. | I felt tired.....                       | 0                 | 1             | 2                | 3               | 4                  | 5              |
| 57. | I felt sleepy.....                      | 0                 | 1             | 2                | 3               | 4                  | 5              |
| 58. | I felt wide awake (couldn't sleep)..... | 0                 | 1             | 2                | 3               | 4                  | 5              |
| 59. | My concentration was off.....           | 0                 | 1             | 2                | 3               | 4                  | 5              |
| 60. | I was more forgetful than usual.....    | 0                 | 1             | 2                | 3               | 4                  | 5              |
| 61. | I felt worried or nervous.....          | 0                 | 1             | 2                | 3               | 4                  | 5              |
| 62. | I felt irritable.....                   | 0                 | 1             | 2                | 3               | 4                  | 5              |
| 63. | I felt restless.....                    | 0                 | 1             | 2                | 3               | 4                  | 5              |
| 64. | I was bored.....                        | 0                 | 1             | 2                | 3               | 4                  | 5              |
| 65. | I felt depressed.....                   | 0                 | 1             | 2                | 3               | 4                  | 5              |
| 66. | I felt alert.....                       | 0                 | 1             | 2                | 3               | 4                  | 5              |
| 67. | I felt good.....                        | 0                 | 1             | 2                | 3               | 4                  | 5              |
| 68. | I was hungry.....                       | 0                 | 1             | 2                | 3               | 4                  | 5              |

**Table MIII. Symptom Weights for ESQ-IV Factor Score<sup>19</sup>**

|                            |                 |       |                          |                    |       |
|----------------------------|-----------------|-------|--------------------------|--------------------|-------|
| <u>AMS-C</u>               |                 |       | <u>Ear, Nose, Throat</u> |                    |       |
| 1                          | Lightheaded     | 0.489 | 3                        | Sinus              | 0.302 |
| 2                          | Headache        | 0.465 | 39                       | Burning/itchy      | 0.367 |
| 4                          | Dizzy           | 0.466 | 42                       | Ears blocked       | 0.441 |
| 5                          | Faint           | 0.346 | 43                       | Ears ached         | 0.300 |
| 6                          | Dim vision      | 0.510 | 44                       | Couldn't hear      | 0.759 |
| 7                          | Coordination    | 0.519 | 45                       | Ears ringing       | 0.784 |
| 19                         | Weak            | 0.387 | 46                       | Stuffy nose        | 0.329 |
| 24                         | Nauseated       | 0.347 | 49                       | Dry mouth          | 0.470 |
| 52                         | Lost appetite   | 0.413 | 50                       | Sore throat        | 0.555 |
| 53                         | Sick            | 0.692 |                          |                    |       |
| 54                         | Hungover        | 0.584 |                          |                    |       |
| <u>AMS-R</u>               |                 |       | <u>Cold Stress</u>       |                    |       |
| 2                          | Headache        | 0.312 | 15                       | Shaking            | 0.358 |
| 8                          | SOB             | 0.745 | 19                       | Weak               | 0.331 |
| 9                          | Hard to breathe | 0.763 | 27                       | Urinate frequently | 0.447 |
| 10                         | Hurt to breathe | 0.734 | 31                       | Feverish           | 0.364 |
| 17                         | Stomach cramp   | 0.516 | 34                       | Hands cold         | 0.642 |
| 22                         | Back ache       | 0.686 | 35                       | Feet cold          | 0.737 |
| 23                         | Stomach ache    | 0.744 | 36                       | Chilly             | 0.720 |
| 24                         | Nauseated       | 0.691 | 37                       | Shivering          | 0.580 |
| 46                         | Stuffy nose     | 0.534 | 61                       | Worried            | 0.520 |
| 48                         | Nose bleed      | 0.578 |                          |                    |       |
| 58                         | Wide-awake      | 0.355 |                          |                    |       |
| 65                         | Depressed       | 0.480 |                          |                    |       |
| <u>Muscular Discomfort</u> |                 |       | <u>Alert</u>             |                    |       |
| 16                         | Muscle cramp    | 0.402 | 56r                      | Tired              | 0.314 |
| 18                         | Tight stiff     | 0.594 | 57r                      | Sleepy             | 0.300 |
| 19                         | Weak            | 0.307 | 58r                      | Wide-awake         | 0.379 |
| 20                         | Legs/feet ache  | 0.492 | 59r                      | Concentration      | 0.351 |
| 21                         | Hands/arms ache | 0.406 | 65r                      | Depressed          | 0.300 |
| 22                         | Back ache       | 0.303 | 66                       | Alert              | 0.783 |
| 25                         | Gas pressure    | 0.317 | 67                       | Good               | 0.787 |
| 38                         | Numb            | 0.315 |                          |                    |       |
| 55                         | Thirsty         | 0.330 |                          |                    |       |
| <u>Distress</u>            |                 |       | <u>Exertion</u>          |                    |       |
| 10                         | Hurt to breathe | 0.315 | 1                        | Lightheaded        | 0.371 |
| 13                         | Chest pain      | 0.566 | 8                        | SOB                | 0.321 |
| 14                         | Chest pressure  | 0.540 | 9                        | Hard to breathe    | 0.419 |
| 51                         | Coughing        | 0.523 | 10                       | Hurt to breathe    | 0.351 |
| 53                         | Sick            | 0.373 | 11                       | Fast Heart         | 0.573 |
| 56                         | Tired           | 0.348 | 12                       | Pounding heart     | 0.505 |
| 57                         | Sleepy          | 0.318 | 13                       | Chest pain         | 0.471 |
| 61                         | Worried         | 0.379 | 19                       | Weak               | 0.366 |
| 62                         | Irritable       | 0.546 |                          |                    |       |
| 63                         | Restless        | 0.525 |                          |                    |       |
| 64                         | Bored           | 0.492 |                          |                    |       |
| 65                         | Depressed       | 0.479 |                          |                    |       |
|                            |                 |       | <u>Fatigue</u>           |                    |       |
|                            |                 |       | 1                        | Lightheaded        | 0.384 |
|                            |                 |       | 4                        | Dizzy              | 0.418 |
|                            |                 |       | 5                        | Faint              | 0.416 |
|                            |                 |       | 19                       | Weak               | 0.492 |
|                            |                 |       | 40                       | Eyes irritated     | 0.398 |
|                            |                 |       | 41                       | Blurry vision      | 0.304 |
|                            |                 |       | 47                       | Runny nose         | 0.319 |
|                            |                 |       | 55                       | Thirsty            | 0.371 |
|                            |                 |       | 56                       | Tired              | 0.665 |
|                            |                 |       | 57                       | Sleepy             | 0.579 |
|                            |                 |       | 58                       | Wide-awake         | 0.300 |
|                            |                 |       | 59                       | Concentration      | 0.312 |

**Table MIV. Summary Statistics for AMS-C and AMS-R at 650 feet**

| Hour | AMS-C |       |         |       |           | AMS-R |       |         |       |
|------|-------|-------|---------|-------|-----------|-------|-------|---------|-------|
|      | N     | Mean  | Std Dev | Max   | 97.5 %ile | N     | Mean  | Std Dev | Max   |
| 0    | 103   | 0.048 | 0.121   | 0.926 | 0.432     | 103   | 0.083 | 0.124   | 0.736 |
| 1    | 103   | 0.030 | 0.075   | 0.496 | 0.255     | 103   | 0.080 | 0.120   | 0.780 |
| 3    | 103   | 0.049 | 0.095   | 0.478 | 0.387     | 103   | 0.100 | 0.121   | 0.775 |
| 5    | 94    | 0.049 | 0.180   | 1.613 | 0.350     | 94    | 0.110 | 0.161   | 1.117 |
| 7    | 103   | 0.047 | 0.094   | 0.448 | 0.343     | 103   | 0.115 | 0.135   | 0.686 |
| 9    | 103   | 0.065 | 0.154   | 0.942 | 0.621     | 103   | 0.130 | 0.155   | 0.775 |
| 11   | 103   | 0.075 | 0.156   | 0.813 | 0.621     | 103   | 0.160 | 0.182   | 1.221 |
| 13   | 103   | 0.088 | 0.138   | 0.986 | 0.496     | 103   | 0.169 | 0.195   | 1.179 |
| 19   | 102   | 0.167 | 0.306   | 1.881 | 1.116     | 101   | 0.303 | 0.298   | 1.498 |
| 20   | 103   | 0.130 | 0.226   | 1.217 | 0.835     | 103   | 0.217 | 0.232   | 1.320 |
| 21   | 103   | 0.134 | 0.264   | 1.487 | 0.801     | 102   | 0.195 | 0.205   | 1.044 |

**Table MV. Time-dependent Criterion Scores for ESQ-IV Factors\***

| Hour | Number of Factor Scores | AMS-C | AMS-R | Muscular Discomfort | Exertion | Fatigue | Cold Stress | Distress | ENT   | Alert |
|------|-------------------------|-------|-------|---------------------|----------|---------|-------------|----------|-------|-------|
| 0    | 502                     | 0.432 | 0.402 | 0.724               | 0.328    | 1.067   | 0.893       | 0.541    | 0.554 | 2.678 |
| 1    | 103                     | 0.432 | 0.402 | 0.752               | 0.328    | 1.067   | 1.150       | 0.541    | 0.904 | 2.825 |
| 3    | 103                     | 0.432 | 0.402 | 0.992               | 0.389    | 1.067   | 0.893       | 0.720    | 0.822 | 2.678 |
| 5    | 93                      | 0.432 | 0.402 | 1.038               | 0.328    | 1.067   | 0.893       | 0.724    | 0.900 | 2.799 |
| 7    | 103                     | 0.432 | 0.471 | 1.450               | 0.328    | 1.067   | 0.893       | 0.885    | 0.904 | 2.678 |
| 9    | 103                     | 0.621 | 0.587 | 1.686               | 0.328    | 1.338   | 1.200       | 1.128    | 1.076 | 2.678 |
| 11   | 103                     | 0.621 | 0.593 | 1.942               | 0.328    | 1.410   | 0.983       | 1.403    | 1.081 | 2.853 |
| 13   | 103                     | 0.496 | 0.603 | 1.834               | 0.328    | 1.756   | 0.953       | 1.435    | 1.047 | 3.059 |
| 19   | 101                     | 1.116 | 1.174 | 2.928               | 0.657    | 2.052   | 1.170       | 1.886    | 1.257 | 3.665 |
| 20   | 103                     | 0.835 | 0.912 | 2.722               | 0.328    | 1.985   | 0.893       | 1.743    | 1.065 | 3.371 |
| 21   | 103                     | 0.801 | 0.775 | 3.050               | 0.328    | 2.210   | 1.017       | 1.277    | 1.076 | 3.405 |

\* Time-dependent Criterion Score for factor at t<sup>th</sup> hour is greater of 97.5<sup>th</sup> percentile value for factor at Hour 0 and 97.5<sup>th</sup> percentile value for that factor at Hour t.

**Table MVI. AMS-R Factor Scores for Four Hypothetical Volunteers**

| Hour | Volunteer |      |      |      | Time-Dependent Criterion | Point Prevalence | Cumulative Prevalence |
|------|-----------|------|------|------|--------------------------|------------------|-----------------------|
|      | A         | B    | C    | D    |                          |                  |                       |
| 1    | 0.30      | 0.20 | 0.25 | 0.15 | 0.402                    | $0/4 = 0\%$      | $0/4 = 0\%$           |
| 3    | 0.35      | 0.45 | 0.30 | 0.30 | 0.402                    | $1/4 = 25\%$     | $1/4 = 25\%$          |
| 5    | 0.65      | 0.50 | 0.30 | 0.35 | 0.402                    | $2/4 = 50\%$     | $2/4 = 50\%$          |
| 7    | 0.65      | 0.55 | 0.35 | 0.35 | 0.471                    | $2/4 = 50\%$     | $2/4 = 50\%$          |
| 9    | 0.70      | 0.55 | 0.50 | 0.40 | 0.587                    | $1/4 = 25\%$     | $2/4 = 50\%$          |
| 11   | 0.80      | 0.55 | 0.70 | 0.45 | 0.593                    | $2/4 = 50\%$     | $3/4 = 75\%$          |
| 13   | 1.00      | 0.58 | 0.70 | 0.55 | 0.603                    | $2/4 = 50\%$     | $3/4 = 75\%$          |
| 19   | 1.20      | 0.70 | 0.80 | 0.65 | 1.174                    | $1/4 = 25\%$     | $3/4 = 75\%$          |
| 20   | 1.20      | 0.70 | 0.80 | 0.70 | 0.912                    | $1/4 = 25\%$     | $3/4 = 75\%$          |

**Table MVII. Tests of Sensory and Psychomotor Performance**

| Test of Performance                              | Description                                                                                                                                                                                                                                                                                                                                                                                                                                                                                                                                                                                                                                                                                                                                                                                                                                                                                                             |
|--------------------------------------------------|-------------------------------------------------------------------------------------------------------------------------------------------------------------------------------------------------------------------------------------------------------------------------------------------------------------------------------------------------------------------------------------------------------------------------------------------------------------------------------------------------------------------------------------------------------------------------------------------------------------------------------------------------------------------------------------------------------------------------------------------------------------------------------------------------------------------------------------------------------------------------------------------------------------------------|
| Purdue Pegboard*                                 | <p>The Purdue Pegboard measures unilateral and bilateral dexterity. The device consists of a board with predrilled holes, pegs, collars, and washers. The pegs are inserted into the holes, and specified combinations of collars and washers in a specified sequence are assembled on the pegs by the test volunteer using the right, left, or both hands. Scoring is based on the number of “assemblies” created in a fixed time period. A higher score is better than a lower score.</p> <p>Normative scores (mean ± 1 SD): 43.6 ± 4.6 assembly job applicants.<br/>                     39.3 ± 5.9 general factory work applicants<br/>                     40.7 ± 6.7 production workers</p> <p>Purdue Pegboard Quick Reference Guide, Revised Edition, 1999. Lafayette, IN</p>                                                                                                                                    |
| Kentucky Comprehensive Listening Test*           | <p>The Kentucky Comprehensive Listening Test, published by the Kentucky Listening Research Center, is designed for college students and adults. The most recent version was published in 1985. The test is designed to overcome certain inherent difficulties in listening tests, in which the test measures intelligence rather than listening. The portion of the Test used in this study consisted of a list of 5 numbers presented orally followed by a statement describing one of the numbers. The volunteers were provided an answer sheet that may or may not have included the correct answer. Instructions were to circle the number described by the statement. Scoring was based on number of correct responses. A higher score is better than a lower score.</p> <p>Bostrom RN, Waldhart ES. 1983. The Kentucky Comprehensive Listening Test. Lexington, Kentucky: Kentucky Listening Research Center.</p> |
| Snellen Visual Acuity†                           | <p>A standard Snellen Eye Chart was used at a distance of 20 feet. The last row of letters the volunteer could read with less than a 50% error rate determined the measure of visual acuity. For analysis, the denominator of the Snellen "fraction" (20/30) was used as the "score". A lower score is better than a higher score.</p> <p>Norms are incompletely established, but most likely age dependent. Elliott DB, Yang KC, Whitaker D. Visual acuity changes throughout adulthood in normal, healthy eyes: seeing beyond 6/6. Optom Vis Sci, 1995; 72:186-91.</p>                                                                                                                                                                                                                                                                                                                                                |
| Farnsworth-Munsell 100 Hue Color Discrimination‡ | <p>The Farnsworth-Munsell 100 Hue test examines hue discrimination ability. The test kit contains 93 color discs and is conducted on a True Daylight Illuminator, a device that consists of a working surface and an electric light source that provides a standardized illumination environment. The test is performed by mixing a preselected set of disks and having the test volunteer arrange them in order of spectral progression. Scoring was based on number and magnitude of incorrect arrangements. A lower score is better than a higher score.</p> <p>Norms are age dependent. See Kinnear, PR, Sahraie A. New Farnsworth-Munsell 100 hue test norms of normal observers fore each year of age 5-22 and for age decades 30 – 70. Br J. Ophthalmol 2002; 86:1408-11.</p>                                                                                                                                    |

\* Administered at hours 2, 5, 10, 13, 19, and 21

† Administered at hours 1, 3, 8, 13, 19, and 21

‡ Administered once per volunteer between hours 6 and 12

## Altitude Selection Algorithm

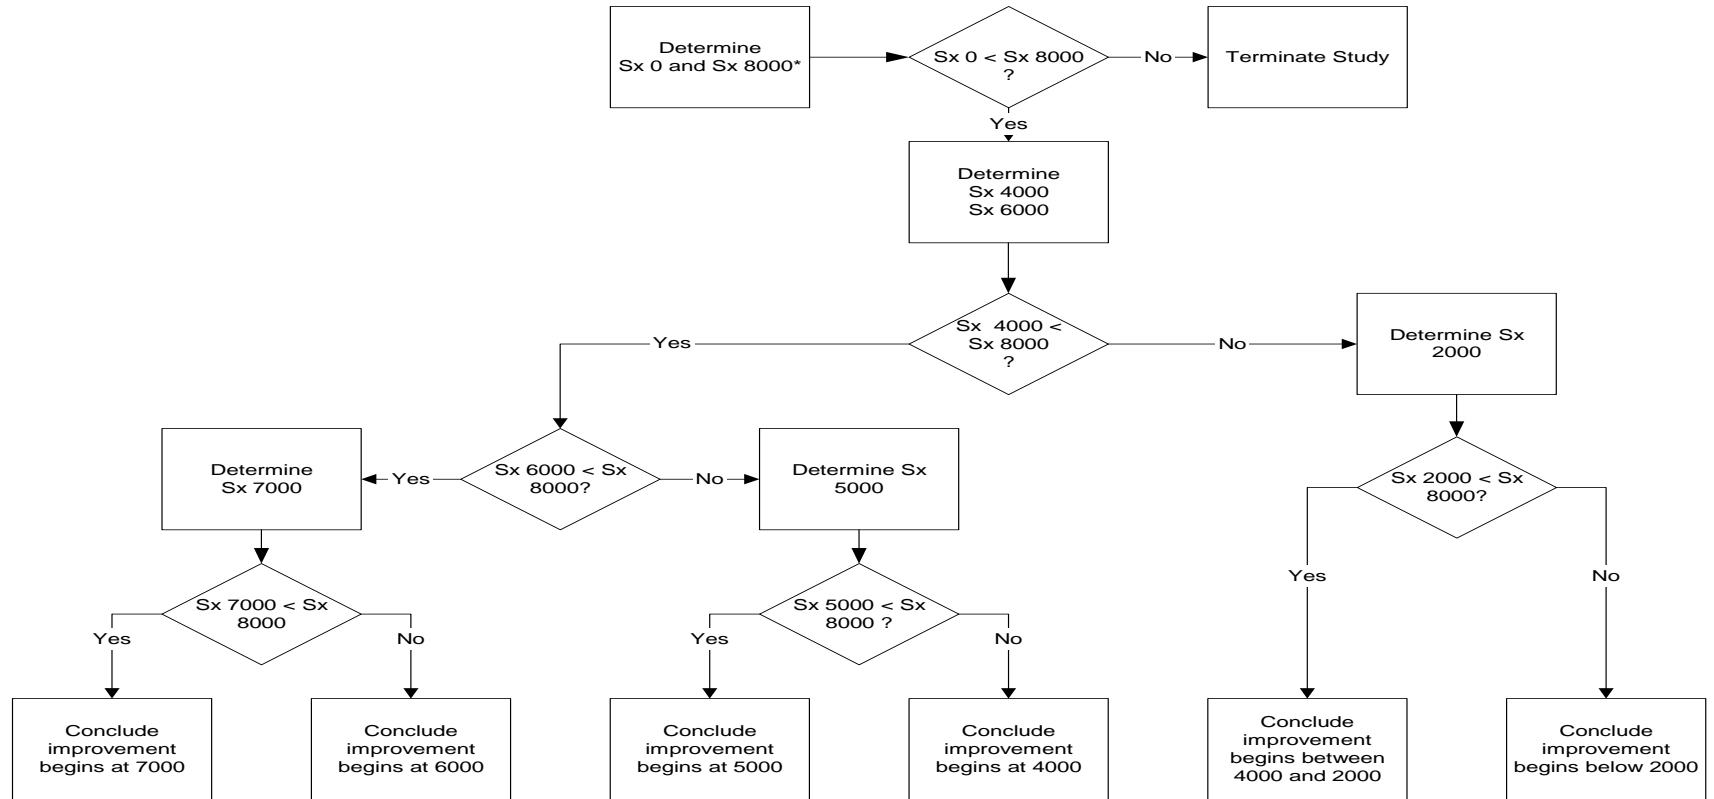

\* "Sx altitude" means cumulative prevalence of symptoms at that altitude

**Figure M1.** Logic used to select altitudes to study. Midway thru data collection at 4,000 feet and 6,000 feet it became apparent that 7,000 feet would be selected. To preserve blinding, 4,000 6,000 and 7,000 feet were included in random sequencing.

**Figure M2. Distributions of AMS-C Scores for the 650 foot Group by Hour**

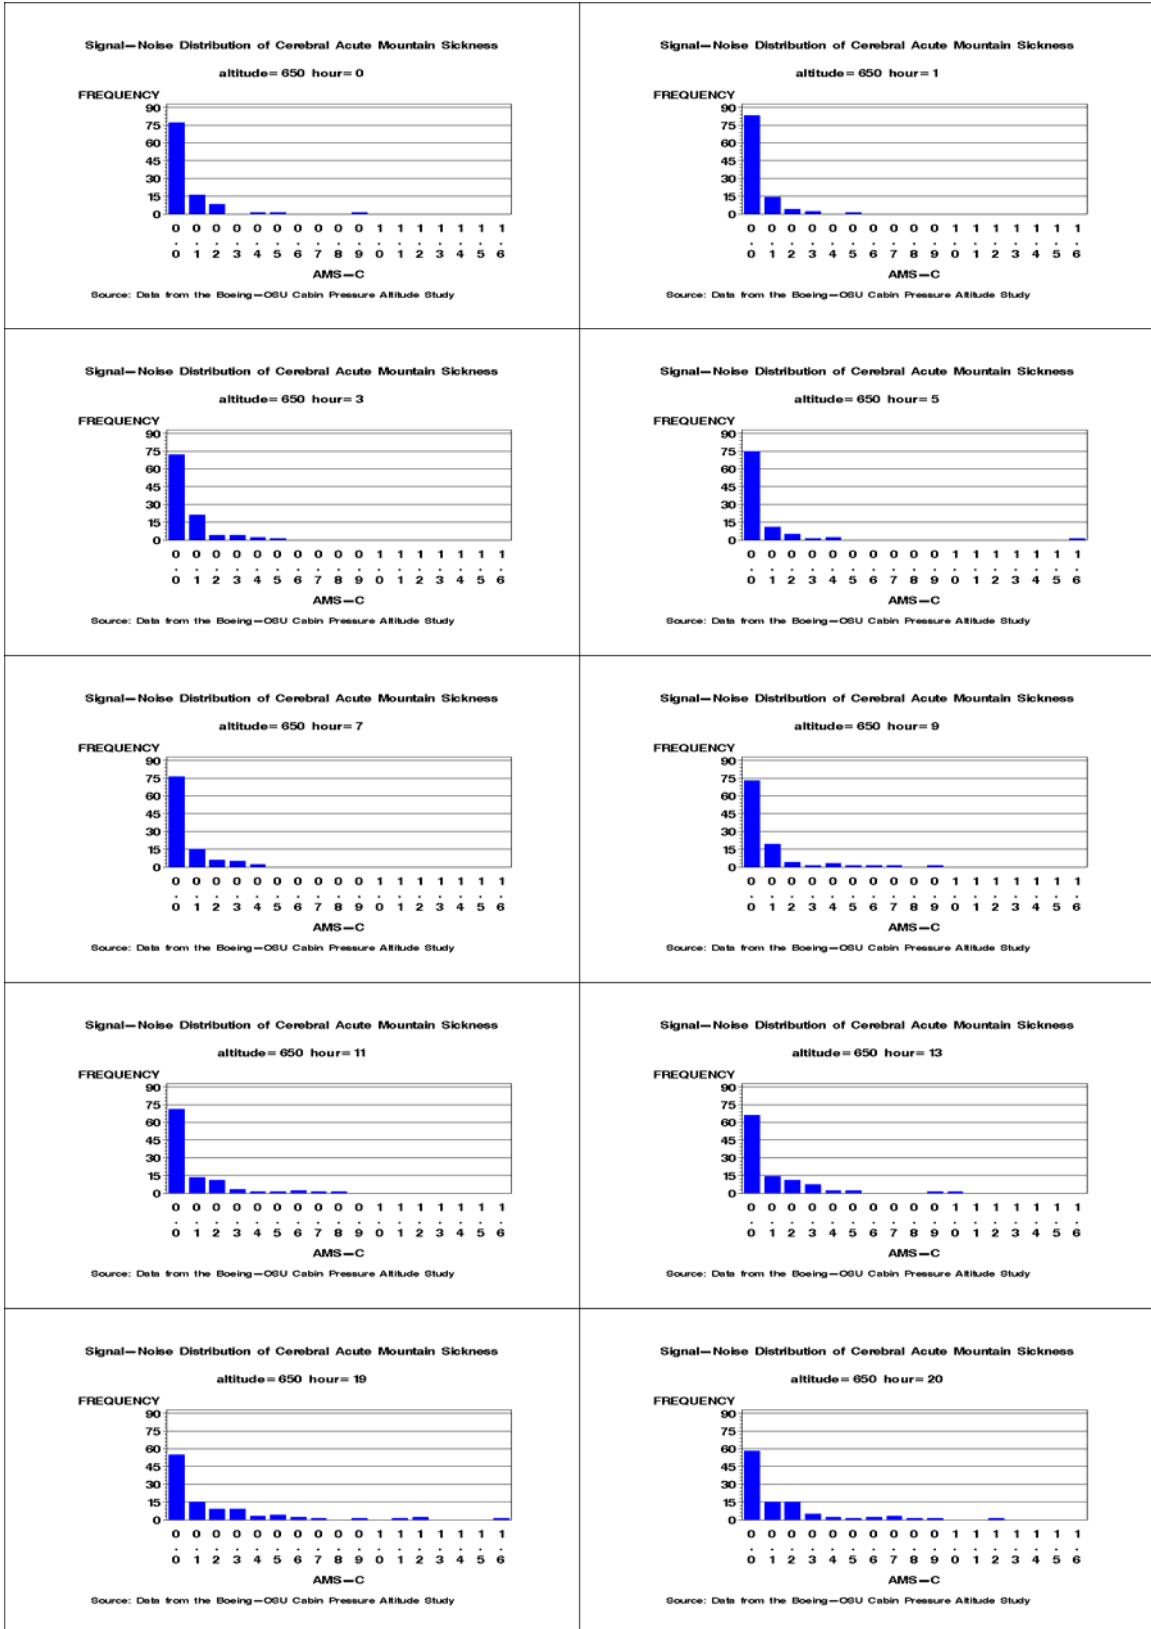

Figure M3. Distributions of AMS-R Scores for the 650 foot Group by Hour

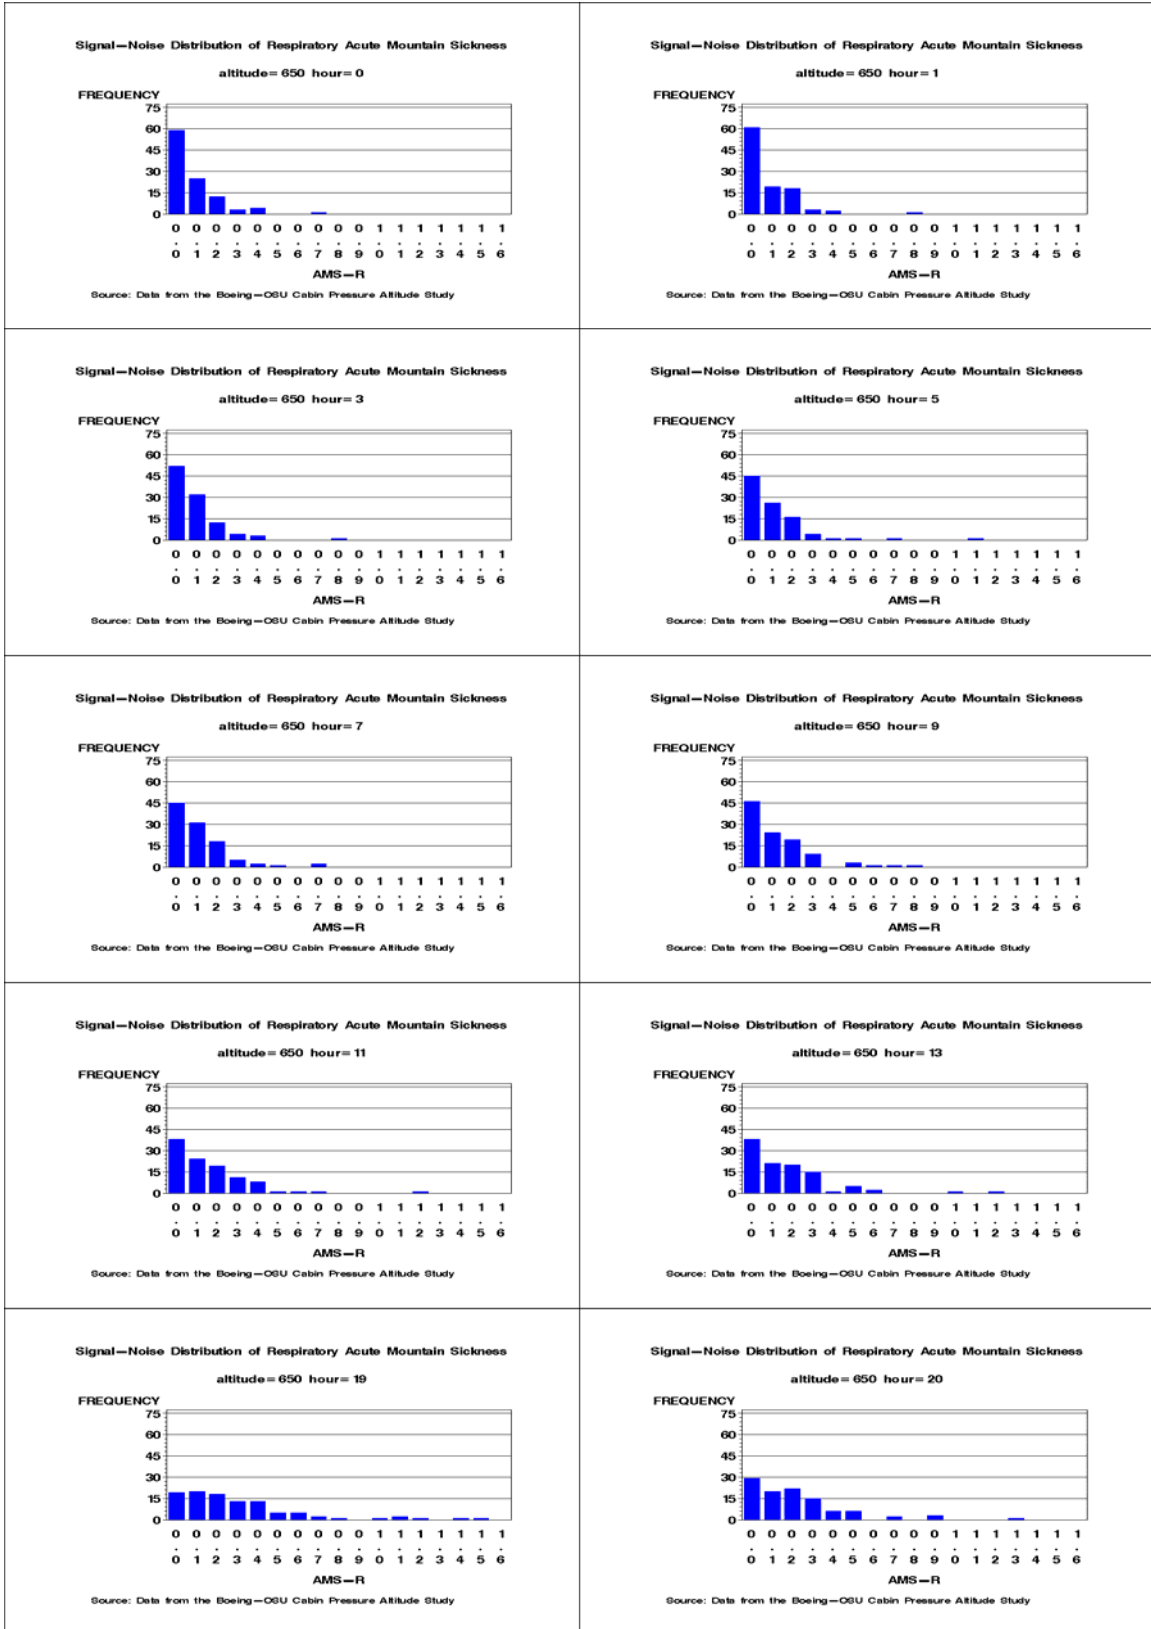

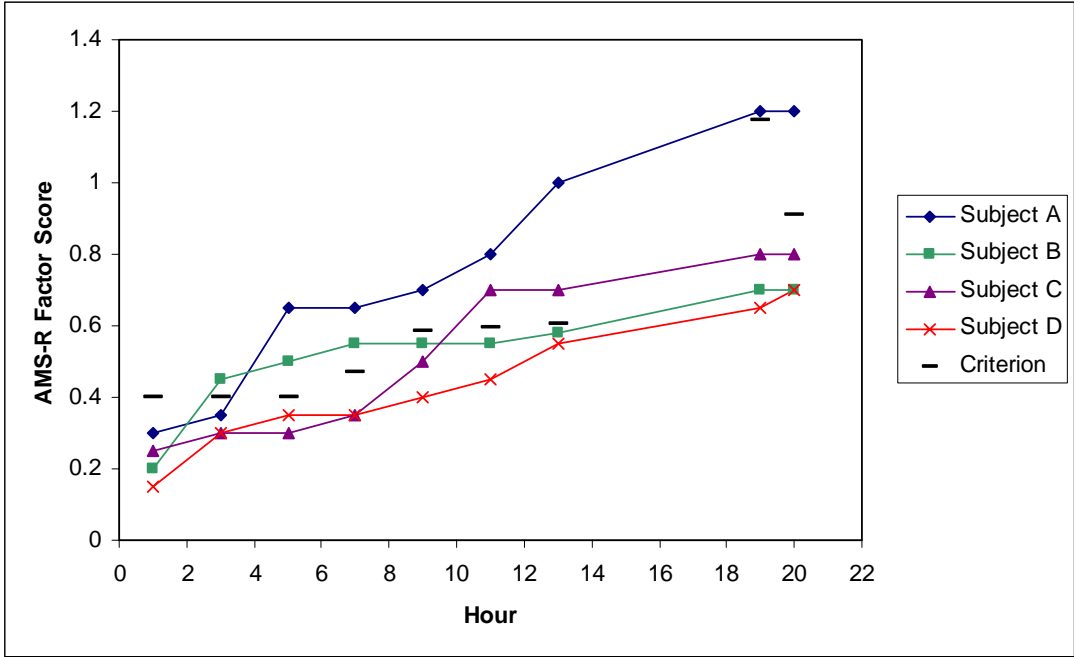

**Figure M4. AMS-R Factor Scores for Four Hypothetical Volunteers**

Notional Data. Displays AMS-R scores for 4 hypothetical participants and corresponding time-dependent criterion scores. See Table MV for point prevalence and cumulative prevalence calculations.

**Table RI. Chamber environmental parameters**

|                                      | <b>650 feet</b><br>(742 mm Hg) | <b>4000 feet</b><br>(656 mm Hg) | <b>6000 feet</b><br>(609 mm Hg) | <b>7000 feet</b><br>(586 mm Hg) | <b>8000 feet</b><br>(565 mm Hg) |
|--------------------------------------|--------------------------------|---------------------------------|---------------------------------|---------------------------------|---------------------------------|
| <b>Number of Sessions</b>            | 9*                             | 9                               | 9                               | 9                               | 9†                              |
| <b>Equivalent Altitude‡</b><br>feet  | 815 ± 64<br>(190 - 1400)       | 4029 ± 66<br>(620 - 4240)       | 6033 ± 25<br>(5930 - 6720)      | 6993 ± 24<br>(6740 - 7180)      | 8085 ± 50<br>(7936 - 8233)      |
| <b>Barometric Pressure</b><br>mm Hg§ | 738 ± 1.8                      | 655 ± 1.8                       | 608 ± 0.7                       | 587 ± 0.7                       | 563 ± 1.4                       |
| <b>Temperature</b><br>degrees F      | 71.2 ± 2.2<br>(63.1 - 77.6)    | 71.5 ± 2.2<br>(62.1 - 77.2)     | 71.1 ± 2.3<br>(63.4 - 79.8)     | 70.7 ± 1.8<br>(64.2 - 76.3)     | 71.1 ± 2.1<br>(64.1 - 77.9)     |
| <b>Relative Humidity</b><br>percent  | 43.3 ± 3.6<br>(28.3 - 59.5)    | 33.2 ± 2.7<br>(16.4 - 71.4)     | 34.8 ± 3.5<br>(16.3 - 55.8)     | 36.9 ± 2.9<br>(19.7 - 64.7)     | 36.6 ± 4.5<br>(17.4 - 71.6)     |

Results given in mean ± one standard deviation, (range)

\* Data not available from 2 sessions

† Data not available from 1 session

‡ Instantaneous readings from hours 2 through 19

§ Pressure calculated from measured equivalent altitude using Standard Atmosphere<sup>21</sup>

**Table RII. Preexercise SaO<sub>2</sub> in Exercising and Sedentary Groups**

| Hour    | Young Age<br>(21 – 39 years) |       |           |          | Middle Age<br>(40 – 60 years) |       |           |          | Combined<br>(21 – 60 years) |       |           |          | Old Age<br>(61 – 78 years) |
|---------|------------------------------|-------|-----------|----------|-------------------------------|-------|-----------|----------|-----------------------------|-------|-----------|----------|----------------------------|
|         | Exercise                     |       | Sedentary | P value* | Exercise                      |       | Sedentary | P value* | Exercise                    |       | Sedentary | P value* | Sedentary                  |
|         | Pre                          | Post  |           |          | Pre                           | Post  |           |          | Pre                         | Post  |           |          |                            |
| 1       | 96.11                        | 94.90 | 94.88     | <0.001   | 95.50                         | 94.48 | 94.71     | 0.007    | 95.80                       | 94.69 | 94.79     | <0.001   | 94.52                      |
| 3       | 95.97                        | 94.63 | 95.23     | 0.003    | 95.28                         | 93.82 | 94.71     | 0.06     | 95.62                       | 94.23 | 94.97     | <0.001   | 94.17                      |
| 5       | 95.94                        | 94.47 | 95.30     | 0.03     | 94.57                         | 93.65 | 94.44     | 0.71     | 95.26                       | 94.06 | 94.87     | 0.09     | 93.99                      |
| 7       | 95.81                        | 94.44 | 95.12     | 0.008    | 95.31                         | 93.18 | 94.40     | 0.004    | 95.56                       | 93.81 | 94.76     | <0.001   | 93.51                      |
| 9       | 95.86                        | 94.67 | 95.29     | 0.03     | 94.73                         | 93.37 | 94.35     | 0.22     | 95.30                       | 94.02 | 94.82     | 0.02     | 94.03                      |
| 1 - 9   | 95.94                        | 94.62 | 95.16     | <0.001   | 95.08                         | 93.70 | 94.52     | 0.02     | 95.51                       | 94.16 | 94.84     | <0.001   | 94.04                      |
| 11      | 95.05                        |       | 95.12     | 0.75     | 94.27                         |       | 94.19     | 0.78     | 94.66                       |       | 94.66     | 0.99     | 93.62                      |
| 13      | 94.97                        |       | 95.06     | 0.71     | 94.24                         |       | 94.30     | 0.83     | 94.61                       |       | 94.68     | 0.69     | 93.59                      |
| 16      | 94.50                        |       | 94.34     | 0.59     | 93.05                         |       | 93.26     | 0.55     | 93.77                       |       | 93.80     | 0.91     | 92.51                      |
| 19      | 95.43                        |       | 95.40     | 0.93     | 94.61                         |       | 94.66     | 0.88     | 95.02                       |       | 95.03     | 0.96     | 94.08                      |
| 11 - 19 | 94.99                        |       | 94.98     | 0.98     | 94.04                         |       | 94.10     | 0.79     | 94.51                       |       | 94.54     | 0.85     | 93.45                      |
| Overall | 95.52                        |       | 95.08     | 0.01     | 94.62                         |       | 94.34     | 0.19     | 95.07                       |       | 94.71     | 0.01     | 93.78                      |

Exercise hours

\* Exerciser (PreExercise) vs Sedentary

**Table RIII. Summary of P Values of Log Rank Analyses of Cumulative Prevalence Using Time-Dependent Criterion Scores\***

| Contrasts               | Outcomes |                          |                     |              |             |             |
|-------------------------|----------|--------------------------|---------------------|--------------|-------------|-------------|
|                         | AMS†     | Altitude-related malaise | Muscular discomfort | Exertion     | Fatigue     | Cold Stress |
| <b>All altitudes</b>    | 0.33     | <b>0.02</b>              | <b>0.002</b>        | <b>0.03</b>  | 0.10        | <b>0.05</b> |
| <b>8000 ft vs lower</b> | 0.17     | <b>&lt;0.001</b>         | <b>&lt;0.001</b>    | 0.12         | <b>0.05</b> | 0.34        |
| <b>7000 ft vs lower</b> | 0.70     | 0.26                     | 0.12                | <b>0.004</b> | <b>0.04</b> | 0.75        |

\* Cumulative Prevalence is based on time-dependent criterion scores except as noted

† Cumulative prevalence of AMS-C based on published criterion score.

**Table RIV. Summary of Analyses of Point Prevalence of ESQ-IV Factors\***

| Generalized Estimating Equations† |                        |                                                  |                  |                     |                     |                 |                     |
|-----------------------------------|------------------------|--------------------------------------------------|------------------|---------------------|---------------------|-----------------|---------------------|
| Outcome                           | Contrast               | P Value                                          | Baseline         | Altitude            | Age_Activity        | Sex             | Time                |
| Altitude-related malaise‡         | <b>8,000' vs lower</b> | Odds greater at 8,000'   <br><b>P &lt; 0.001</b> | P=0.08           | <b>P &lt; 0.001</b> | <b>P &lt; 0.001</b> | <b>P = 0.11</b> | <b>P &lt; 0.001</b> |
|                                   | <b>7,000' vs lower</b> | P = 0.37                                         |                  |                     |                     |                 |                     |
| Altitude-related malaise          | <b>8,000' vs lower</b> | Odds greater at 8,000'<br><b>P &lt; 0.001</b>    | <b>P = 0.004</b> | <b>P = 0.01</b>     | <b>P &lt; 0.001</b> | P = 0.95        | <b>P = 0.02</b>     |
|                                   | <b>7,000' vs lower</b> | P = 0.32                                         |                  |                     |                     |                 |                     |
| Muscular Discomfort               | <b>8,000' vs lower</b> | Odds greater at 8,000'<br><b>P &lt; 0.001</b>    | P = 0.12         | <b>P = 0.02</b>     | <b>P = 0.04</b>     | P = 0.15        | P = 0.49            |
|                                   | <b>7,000' vs lower</b> | P = 0.15                                         |                  |                     |                     |                 |                     |
| Distress                          | <b>8,000' vs lower</b> | P = 0.93                                         | <b>P = 0.02</b>  | P = 0.49            | <b>P = 0.01</b>     | P = 0.38        | P = 0.10            |
|                                   | <b>7,000' vs lower</b> | Odds greater at 7,000'<br><b>P = 0.04</b>        |                  |                     |                     |                 |                     |

\* **Point Prevalence based on Time-Dependent Criterion Scores except as noted**

† We used Generalized Estimating Equations (GEE) with the within-subject correlation over the flight time modeled as an autoregressive process. Other correlation structures give similar results. The models use the log-odds of the presence of a symptom (AMS, Distress, or Muscular Discomfort) as the response variable and included the following parameters:

Baseline Condition at Hour 0 (1 if symptom present at hour 0, 0 if symptom not present at hour 0),

Altitude (650, 4000, 6000, 7000, 8000),

Sex (Male = 1, Female = 0),

Age\_Activity (Young\_Exercise, Young\_Sedentary, Middle-Age\_Exercise, Middle-Age\_Sedentary, Old\_Sedentary), and

Time (1, 3, 5, 7, 9, 11, 13, 19 hour)

‡ **Point Prevalence based on Published Criterion Scores.**

|| **Direction given only for contrasts where P value < 0.05**

**Table RV. Summary of Log Rank and Cox Proportional Hazards Analyses of Cumulative Prevalence Using Published Criterion Scores**

| Outcome                  | Contrast        | P Value | Model  | Altitude<br>Odds Alt+1000<br>ft<br>/<br>Odds Alt ft | SaO <sub>2</sub><br>Odds SaO <sub>2</sub> +1 %<br>/<br>Odds SaO <sub>2</sub> % | Exercise<br>Odds Active<br>/<br>Odds Sedentary | Sex<br>Odds Female /<br>Odds Male | Age<br>Odds (Age-<br>50)/10 + 1 /<br>Odds (Age –<br>50)/10 | Age <sup>2</sup><br>Odds[(Ag e-<br>50)/10] <sup>2</sup> + 1 /<br>Odds [(Age –<br>50)/10] <sup>2</sup> |
|--------------------------|-----------------|---------|--------|-----------------------------------------------------|--------------------------------------------------------------------------------|------------------------------------------------|-----------------------------------|------------------------------------------------------------|-------------------------------------------------------------------------------------------------------|
| Altitude-related malaise | All Altitudes   | <0.001* | Cox 1† | <b>1.12 (1.02-1.23)</b>                             | -                                                                              | 0.83 (0.52-1.33)                               | <b>1.59 (1.04-2.44)</b>           | <b>0.71 (0.54-0.92)</b>                                    | 0.91 (0.81-1.03)                                                                                      |
|                          | 8,000' vs lower | <0.001  | Cox 2‡ | 1.03 (0.92-1.15)                                    | <b>0.86 (0.78-0.96)</b>                                                        | <b>0.81 (0.51-1.30)</b>                        | <b>1.83 (1.18-2.84)</b>           | <b>0.66 (0.50-0.87)</b>                                    | 0.92 (0.81-1.04)                                                                                      |
|                          | 7,000' vs lower | 0.39    |        |                                                     |                                                                                |                                                |                                   |                                                            |                                                                                                       |
|                          | All Altitudes   | 0.33    | Cox 1  | 1.11 (0.96-1.28)                                    | -                                                                              | 1.05 (0.48-2.27)                               | 1.66 (0.83-3.32)                  | 0.80 (0.53-1.19)                                           | 0.94 (0.78-1.13)                                                                                      |
| AMS-C                    | 8,000' vs lower | 0.17    | Cox 2  | 1.06 (0.88-1.27)                                    | 0.92 (0.77-1.10)                                                               | 1.04 (0.48-2.25)                               | 1.78 (0.87-3.62)                  | 0.77 (0.51-1.17)                                           | 0.95 (0.79-1.15)                                                                                      |
|                          | 7,000' vs lower | 0.70    |        |                                                     |                                                                                |                                                |                                   |                                                            |                                                                                                       |
|                          | All Altitudes   | <0.001  | Cox 1  | <b>1.09 (1.00-1.20)</b>                             | -                                                                              | 0.74 (0.45-1.22)                               | <b>1.64 (1.04-2.57)</b>           | <b>0.67 (0.50-0.90)</b>                                    | 0.90 (0.79-1.03)                                                                                      |
| AMS-R                    | 8,000' vs lower | <0.001  | Cox 2  | 0.99 (0.88-1.11)                                    | <b>0.85 (0.76-0.95)</b>                                                        | 0.73 (0.44-1.19)                               | <b>1.92 (1.20-3.06)</b>           | <b>0.62 (0.46-0.84)</b>                                    | 0.91 (0.79-1.04)                                                                                      |
|                          | 7,000' vs lower | 0.28    |        |                                                     |                                                                                |                                                |                                   |                                                            |                                                                                                       |

\* **Bold font: p < 0.05, or 95% Confidence Interval does not include 1.0**

† **Cox Model 1 includes: Exercise, Sex, Age (centered and in decades), Age<sup>2</sup>, Altitude (in 1000 ft increments)**

‡ **Cox Model 2 includes: Exercise, Sex, Age (centered and in decades), Age<sup>2</sup>, Altitude (in 1000 ft increments), SaO<sub>2</sub>**

Criterion scores for only AMS-C and AMS-R have been published.

**Table RVI. Post Hoc Analysis of Items Significantly Related to Altitude**

|                   |           | Frequency * Weight Contribution of Symptom to Factor |        |          |                     |         |                    |
|-------------------|-----------|------------------------------------------------------|--------|----------|---------------------|---------|--------------------|
| Symptom           | Frequency | AMS-C                                                | AMS-R  | Exertion | Muscular Discomfort | Fatigue | Total Contribution |
| Back aches        | 18        | †                                                    | 12.348 |          | 5.454               |         | 17.802             |
| Headache          | 21        | 9.765                                                | 6.552  |          |                     |         | 16.317             |
| Lightheaded       | 8         | 3.912                                                |        | 2.968    |                     | 3.072   | 9.952              |
| Short of breath   | 9         |                                                      | 6.705  | 2.889    |                     |         | 9.594              |
| Coordination off  | 16        | 8.304                                                |        |          |                     |         | 8.304              |
| Stuffy nose       | 15        |                                                      | 8.01   |          |                     |         | 8.010              |
| Hard to breathe   | 6         |                                                      | 4.578  | 2.514    |                     |         | 7.092              |
| Feel weak         | 4         | 1.548                                                |        | 1.464    | 1.228               | 1.968   | 6.208              |
| Tight/stiff       | 10        |                                                      |        |          | 5.94                |         | 5.940              |
| Feel numbness     | 14        |                                                      |        |          | 4.41                |         | 4.410              |
| Eyes irritated    | 11        |                                                      |        |          |                     | 4.378   | 4.378              |
| Legs/feet ached   | 8         |                                                      |        |          | 3.936               |         | 3.936              |
| Sleepy            | 6         |                                                      |        |          |                     | 3.474   | 3.474              |
| Hands/arms ached  | 8         |                                                      |        |          | 3.248               |         | 3.248              |
| Dizzy             | 3         | 1.338                                                |        |          |                     | 1.254   | 2.592              |
| Thirsty           | 3         |                                                      |        |          | 0.99                | 1.113   | 2.103              |
| Depressed         | 4         |                                                      | 1.92   |          |                     |         | 1.920              |
| Concentration off | 6         |                                                      |        |          |                     | 1.872   | 1.872              |
| Runny nose        | 5         |                                                      |        |          |                     | 1.595   | 1.595              |
| Blurry vision     | 5         |                                                      |        |          |                     | 1.52    | 1.520              |
| Dim Vision        | 3         | 1.503                                                |        |          |                     |         | 1.503              |
| Muscle cramp      | 2         |                                                      |        |          |                     | 0.804   | 0.804              |
| Stomach aches     | 1         |                                                      | 0.744  |          |                     |         | 0.744              |
| Tired             | 1         |                                                      |        |          |                     | 0.665   | 0.665              |
| Lost appetite     | 1         | 0.413                                                |        |          |                     |         | 0.413              |

\* See Table MIII for Symptom weights

† Blank entries indicate Frequency was 0 or Item Weight not published.

**Table RVII. Sensory and Psychomotor Performance Measures\***

| <i>Purdue Peg Board</i>          | Hour 2        |        | Hour 5        |        | Hour 10       |        | Hour 13       |        | Hour 19       |        |
|----------------------------------|---------------|--------|---------------|--------|---------------|--------|---------------|--------|---------------|--------|
|                                  | Est $\beta_i$ | P-Val  |
| intercept                        | -30.133       | 0.94   | 129.099       | 0.41   | 675.231       | 0.10   | 433.536       | 0.06   | 430.159       | 0.10   |
| gender                           | -4.260        | <0.001 | -3.142        | <0.001 | -2.682        | <0.001 | -3.422        | <0.001 | -3.149        | <0.001 |
| exercise                         | 0.910         | 0.17   | -0.004        | 1.00   | 1.359         | 0.03   | 1.342         | 0.04   | 0.357         | 0.57   |
| age                              | -0.289        | <0.001 | -0.293        | <0.001 | -0.292        | <0.001 | -0.300        | <0.001 | -0.277        | <0.001 |
| altitude                         | <0.001        | 0.26   | 0.000         | 0.55   | <0.001        | 0.04   | <0.001        | 0.18   | 0.000         | 0.28   |
| altitude <sup>2</sup>            | 0.000         | 0.56   | 0.000         | 0.82   | 0.000         | 0.25   | 0.000         | 0.60   | 0.000         | 0.80   |
| SaO <sub>2</sub>                 | 1.548         | 0.84   | -1.853        | 0.59   | -13.414       | 0.12   | -8.332        | 0.10   | -8.230        | 0.14   |
| (SaO <sub>2</sub> ) <sup>2</sup> | -0.007        | 0.86   | 0.011         | 0.55   | 0.072         | 0.12   | 0.045         | 0.10   | 0.044         | 0.14   |
| <b>R<sup>2</sup></b>             | 0.400         |        | 0.375         |        | 0.409         |        | 0.424         |        | 0.368         |        |

| <i>Kentucky Comprehensive Listening</i> | Hour 2        |        | Hour 5        |        | Hour 10       |        | Hour 13       |        | Hour 19       |        |
|-----------------------------------------|---------------|--------|---------------|--------|---------------|--------|---------------|--------|---------------|--------|
|                                         | Est $\beta_i$ | P-Val  |
| intercept                               | -60.056       | 0.60   | 2.757         | 0.95   | 56.412        | 0.61   | -90.817       | 0.25   | 42.821        | 0.55   |
| gender                                  | 0.002         | 0.99   | -0.156        | 0.36   | -0.154        | 0.31   | -0.054        | 0.77   | -0.089        | 0.54   |
| exercise                                | -0.050        | 0.81   | -0.219        | 0.27   | 0.020         | 0.91   | -0.026        | 0.90   | -0.302        | 0.08   |
| age                                     | -0.035        | <0.001 | -0.029        | <0.001 | -0.035        | <0.001 | -0.044        | <0.001 | -0.039        | <0.001 |
| altitude                                | 0.000         | 0.31   | 0.000         | 0.70   | 0.000         | 0.83   | 0.000         | 0.34   | 0.000         | 0.63   |
| altitude <sup>2</sup>                   | 0.000         | 0.360  | 0.000         | 0.57   | 0.000         | 0.48   | 0.000         | 0.14   | 0.000         | 0.35   |
| SaO <sub>2</sub>                        | 1.474         | 0.54   | 0.172         | 0.87   | -0.853        | 0.72   | 2.247         | 0.18   | -0.602        | 0.69   |
| (SaO <sub>2</sub> ) <sup>2</sup>        | -0.008        | 0.54   | -0.001        | 0.86   | 0.004         | 0.75   | -0.012        | 0.17   | 0.003         | 0.72   |
| <b>R<sup>2</sup></b>                    | 0.066         |        | 0.039         |        | 0.072         |        | 0.084         |        | 0.082         |        |

| <i>Snellen<br/>Visual Acuity</i> | Hour 1        |                  | Hour 3        |                  | Hour 8        |                  | Hour 13       |                  | Hour 19       |                  |
|----------------------------------|---------------|------------------|---------------|------------------|---------------|------------------|---------------|------------------|---------------|------------------|
|                                  | Est $\beta_i$ | P-Val            |
| intercept                        | -63.772       | 0.86             | 494.741       | 0.14             | -269.697      | 0.41             | -285.941      | 0.27             | 145.919       | 0.63             |
| gender                           | -0.978        | 0.11             | -1.384        | 0.03             | -0.954        | 0.16             | -1.486        | 0.02             | -1.540        | 0.01             |
| exercise                         | 0.139         | 0.85             | 0.115         | 0.87             | 0.669         | 0.39             | 0.488         | 0.49             | -0.012        | 0.99             |
| age                              | 0.122         | <b>&lt;0.001</b> | 0.131         | <b>&lt;0.001</b> | 0.153         | <b>&lt;0.001</b> | 0.130         | <b>&lt;0.001</b> | 0.113         | <b>&lt;0.001</b> |
| altitude                         | 0.000         | 0.77             | <0.001        | 0.22             | 0.000         | 0.60             | 0.000         | 0.55             | 0.000         | 0.89             |
| altitude <sup>2</sup>            | 0.000         | 0.72             | 0.000         | 0.71             | 0.000         | 0.88             | 0.000         | 0.96             | 0.000         | 0.49             |
| SaO <sub>2</sub>                 | 1.534         | 0.84             | -10.328       | 0.14             | 5.885         | 0.41             | 6.298         | 0.26             | -2.887        | 0.66             |
| (SaO <sub>2</sub> ) <sup>2</sup> | -0.008        | 0.85             | 0.055         | 0.15             | -0.031        | 0.42             | -0.033        | 0.26             | 0.016         | 0.65             |
| <b>R<sup>2</sup></b>             | 0.076         |                  | 0.098         |                  | 0.081         |                  | 0.086         |                  | 0.070         |                  |

| <i>Farnsworth<br/>100 Hue</i>    | Hour 6        |                  | Hour 8        |                  | Hour 11       |             | Hour 12       |       |
|----------------------------------|---------------|------------------|---------------|------------------|---------------|-------------|---------------|-------|
|                                  | Est $\beta_i$ | P-Val            | Est $\beta_i$ | P-Val            | Est $\beta_i$ | P-Val       | Est $\beta_i$ | P-Val |
| intercept                        | -45.280       | 0.99             | 4948.481      | 0.57             | -1698.788     | 0.72        | 2894.907      | 0.71  |
| gender                           | 6.362         | 0.41             | 12.100        | 0.33             | 13.765        | 0.08        | -3.196        | 0.78  |
| exercise                         | †             | †                | †             | †                | -4.641        | 0.72        | †             | †     |
| age                              | 1.334         | <b>&lt;0.001</b> | 2.141         | <b>&lt;0.001</b> | 1.084         | <b>0.01</b> | 0.755         | 0.23  |
| altitude                         | -0.005        | 0.37             | 0.018         | 0.12             | 0.000         | 0.96        | 0.016         | 0.11  |
| altitude <sup>2</sup>            | 0.000         | 0.21             | 0.000         | 0.22             | 0.000         | 0.61        | 0.000         | 0.07  |
| SaO <sub>2</sub>                 | -1.926        | 0.98             | -114.861      | 0.54             | 33.269        | 0.74        | -59.552       | 0.72  |
| (SaO <sub>2</sub> ) <sup>2</sup> | 0.025         | 0.96             | 0.651         | 0.52             | -0.161        | 0.77        | 0.308         | 0.73  |
| <b>R<sup>2</sup></b>             | 0.109         |                  | 0.262         |                  | 0.104         |             | 0.084         |       |

\* The following model was fit separately for each outcome at each of the specified hours using linear regression.

$$\text{Outcome} = \text{intercept} + \beta_1 * \text{gender} + \beta_2 * \text{exercise} + \beta_3 * \text{age} + \beta_4 * \text{altitude} + \beta_5 * \text{altitude}^2 + \beta_6 * \text{O}_2 + \beta_7 * (\text{O}_2)^2$$

Where

gender: male = 1, female = 0

Exercise: active = 1, sedentary = 0

age: continuous in years

altitude: continuous in feet

altitude<sup>2</sup>: continuous in feet<sup>2</sup>

SaO<sub>2</sub>: Oxygen saturation, per cent

(SaO<sub>2</sub>)<sup>2</sup>: continuous in per cent<sup>2</sup>

† missing data precluded estimation of coefficient

Effect of Commercial Aircraft Cabin Altitude on Passenger Discomfort: Supplementary Appendix

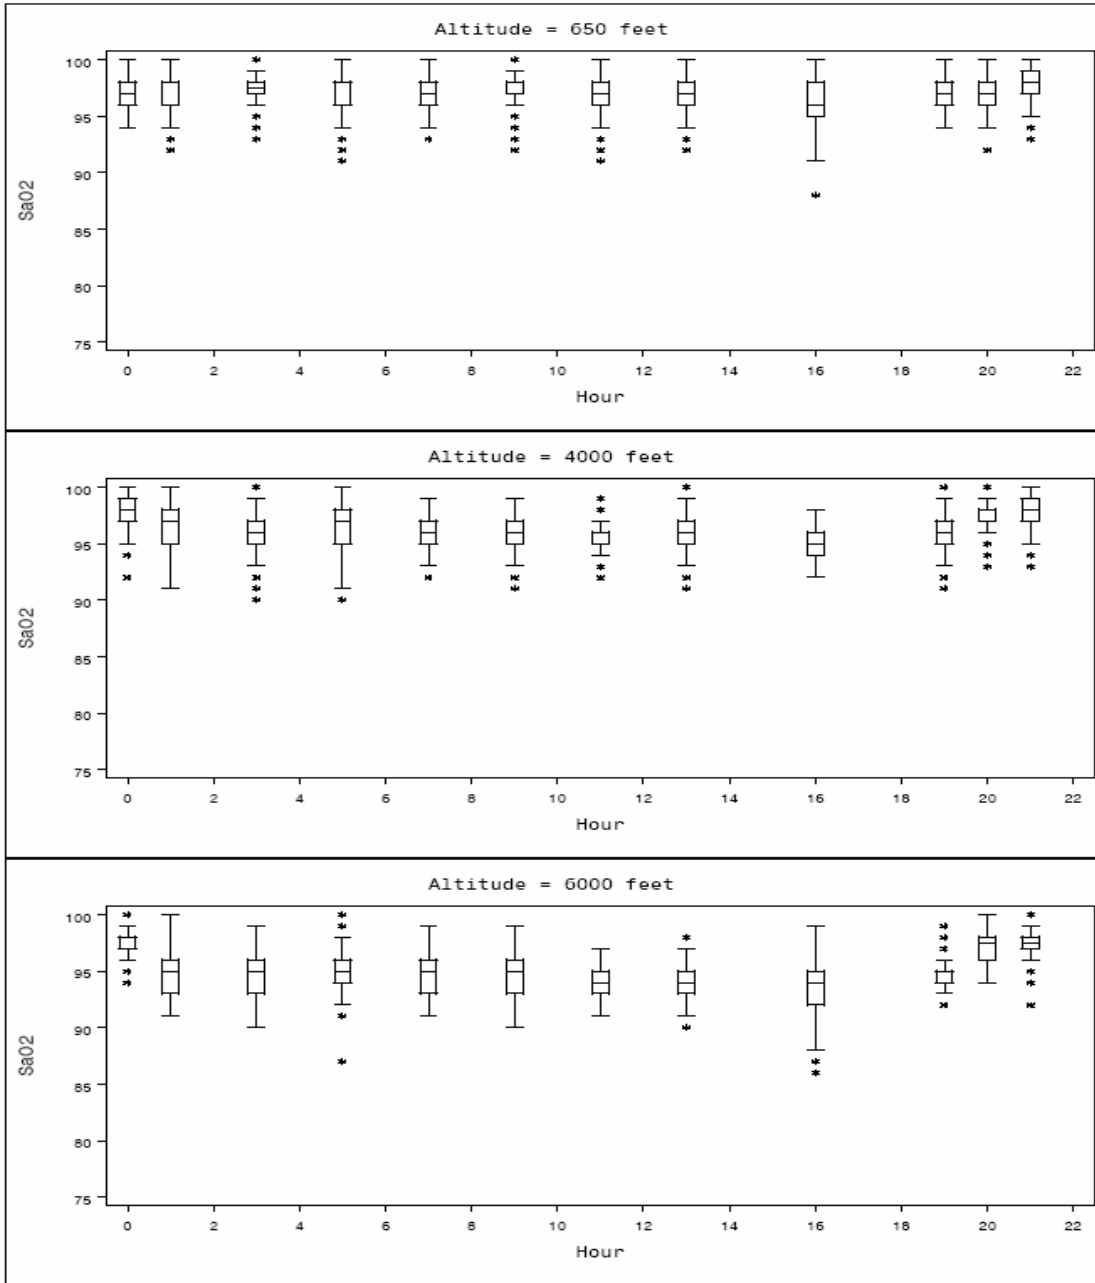

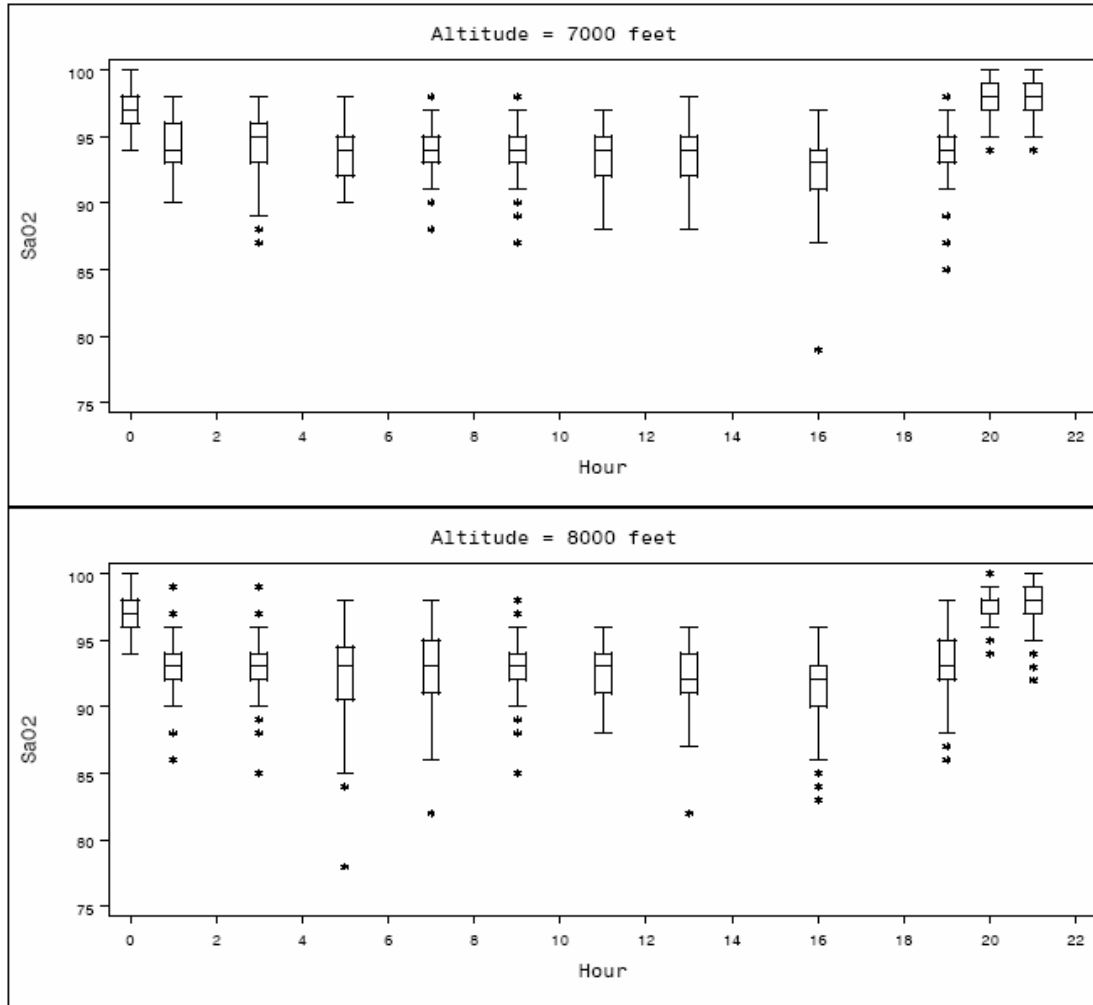

**Figure R1. SaO<sub>2</sub> vs Time. Box and Whisker Plot**

The bottom and top of the box are located at the 25<sup>th</sup> and the 75<sup>th</sup> percentiles. The center line in the box indicates the median. The whiskers are drawn from the box to the most extreme point within 1.5 quartile ranges from the median. Any values more extreme are marked with a star.

Mean SaO<sub>2</sub> decreases and range of values increases with altitude.

Note: in Figures R2 through R5, the label "AMS-D" refers to the factor called "altitude-related malaise" in text.

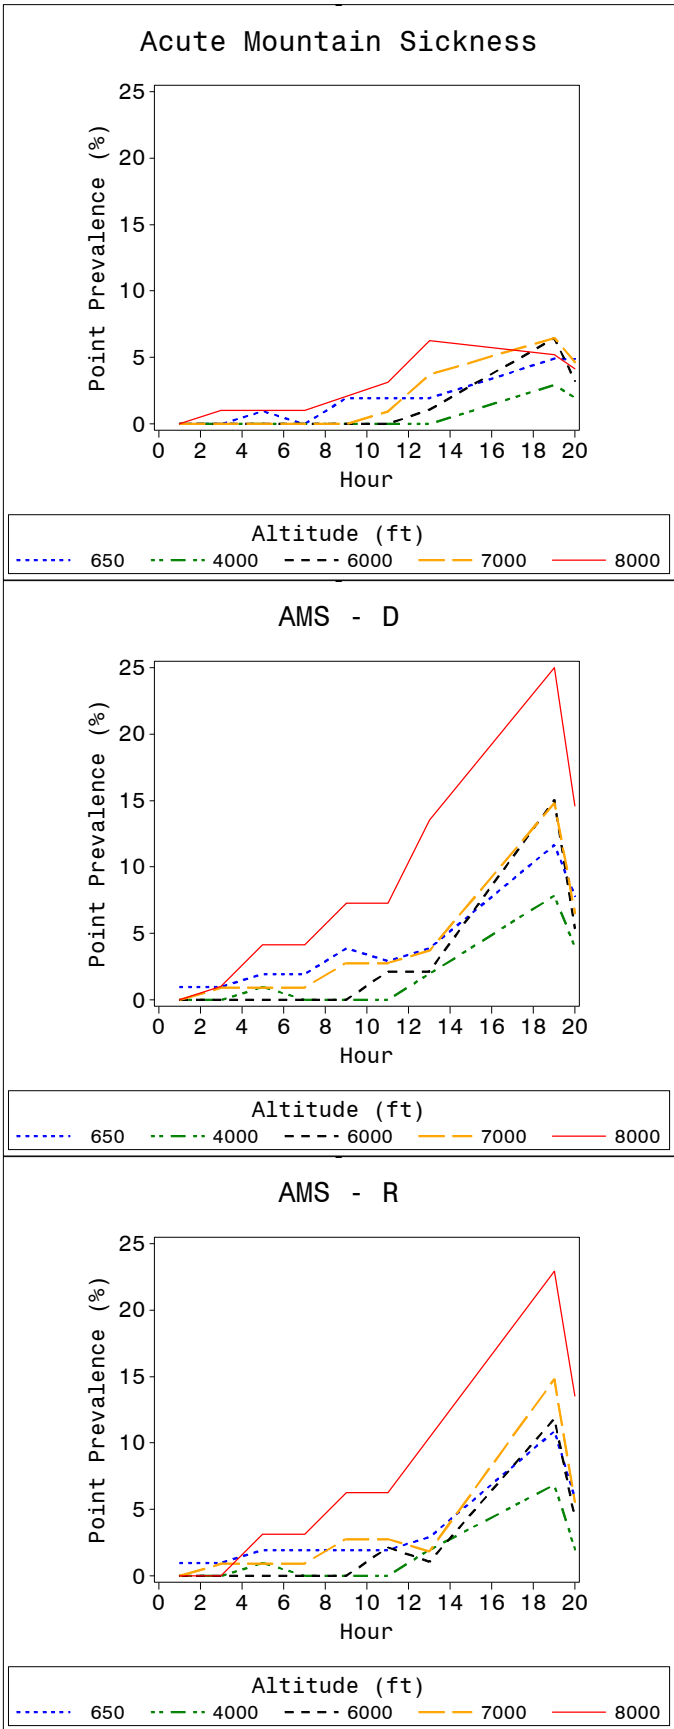

Figure R2: Point Prevalence, Published Criterion Scores

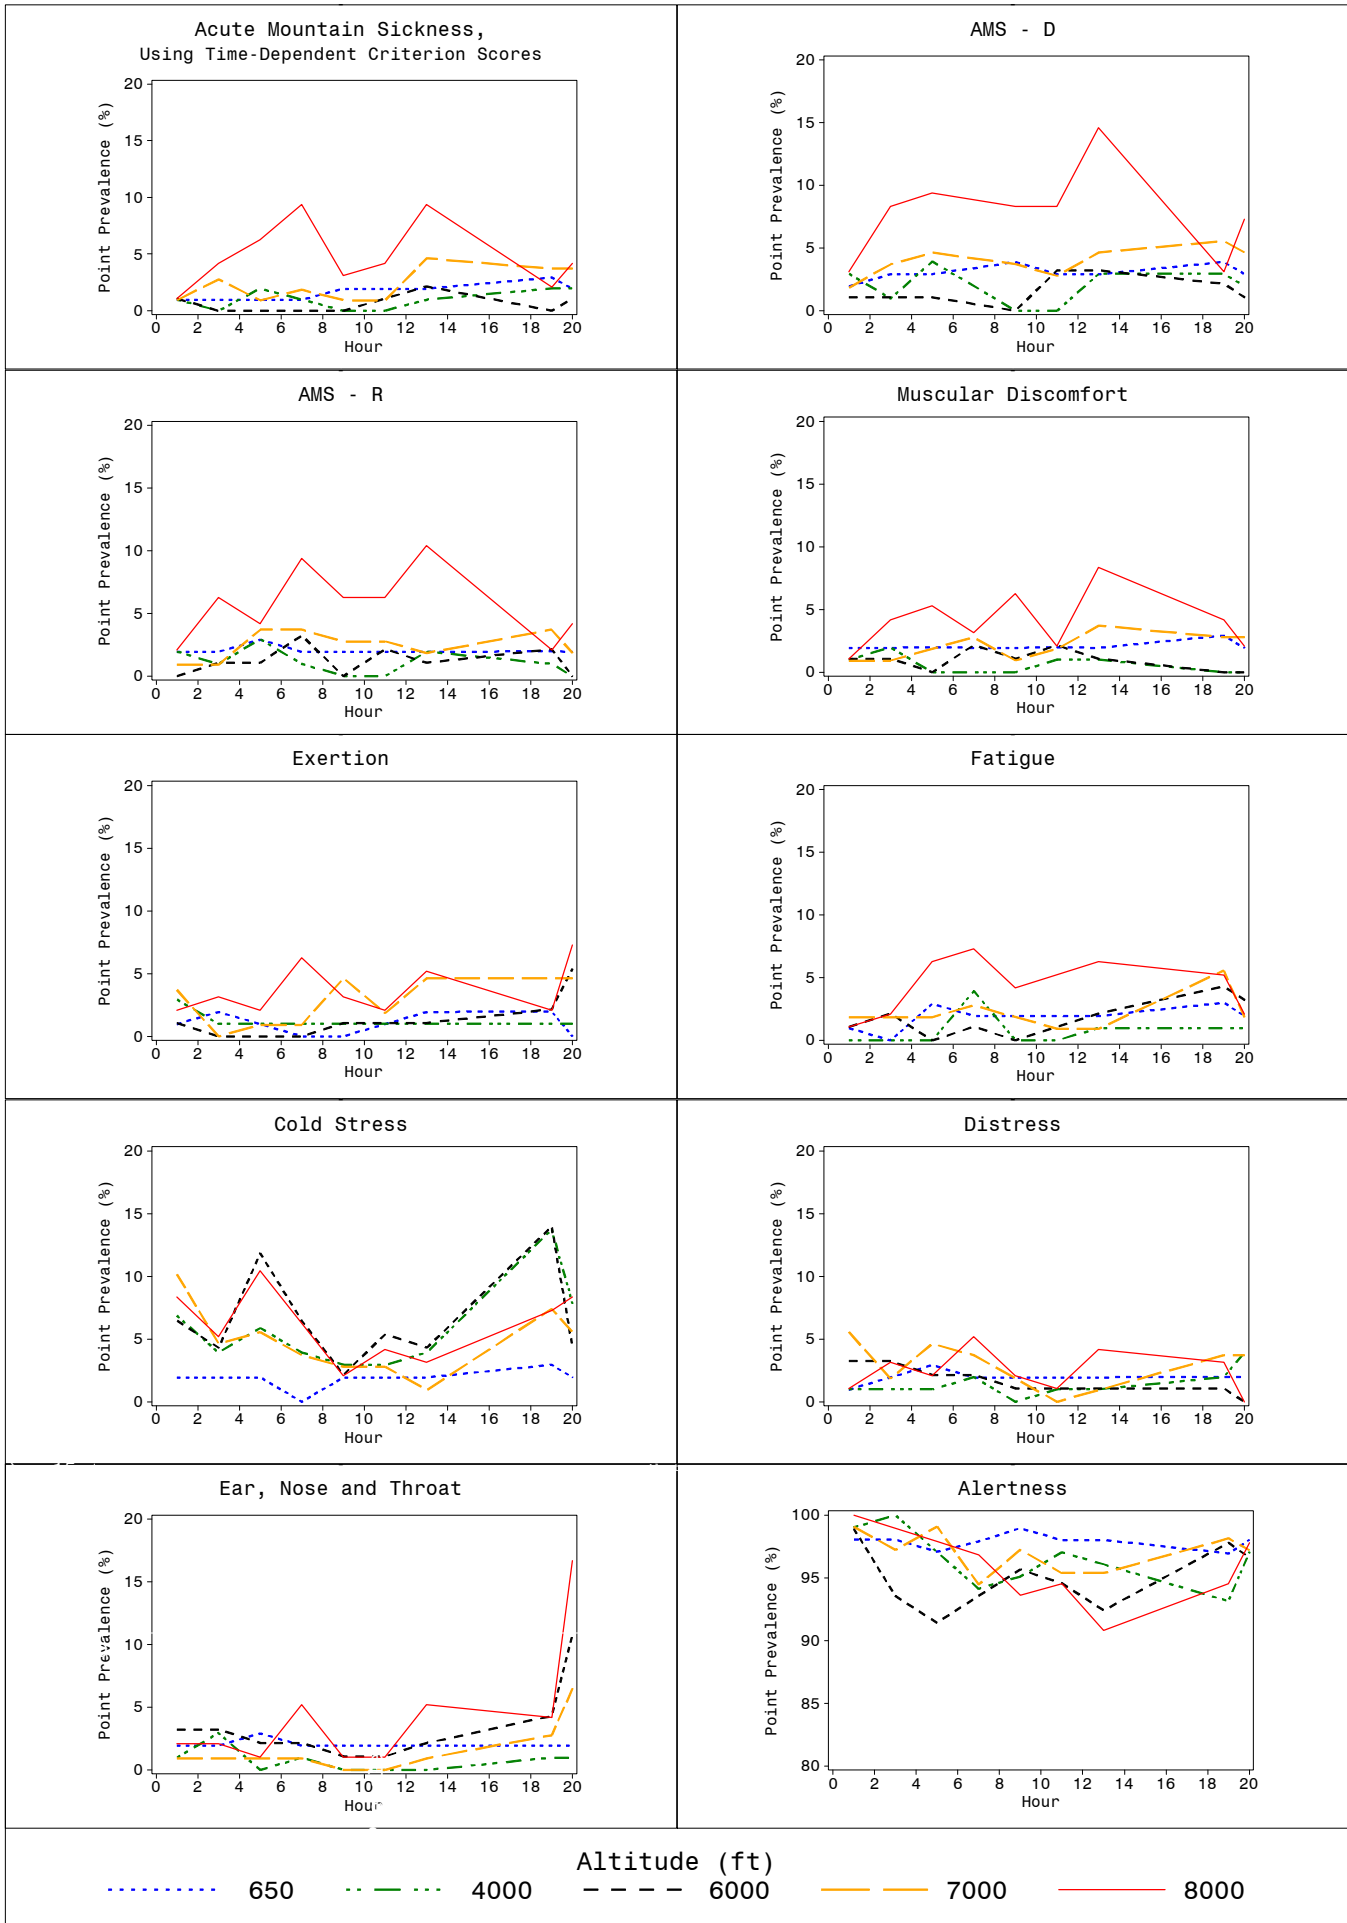

Figure R3: Point Prevalence, Time Dependent Criterion Scores 28

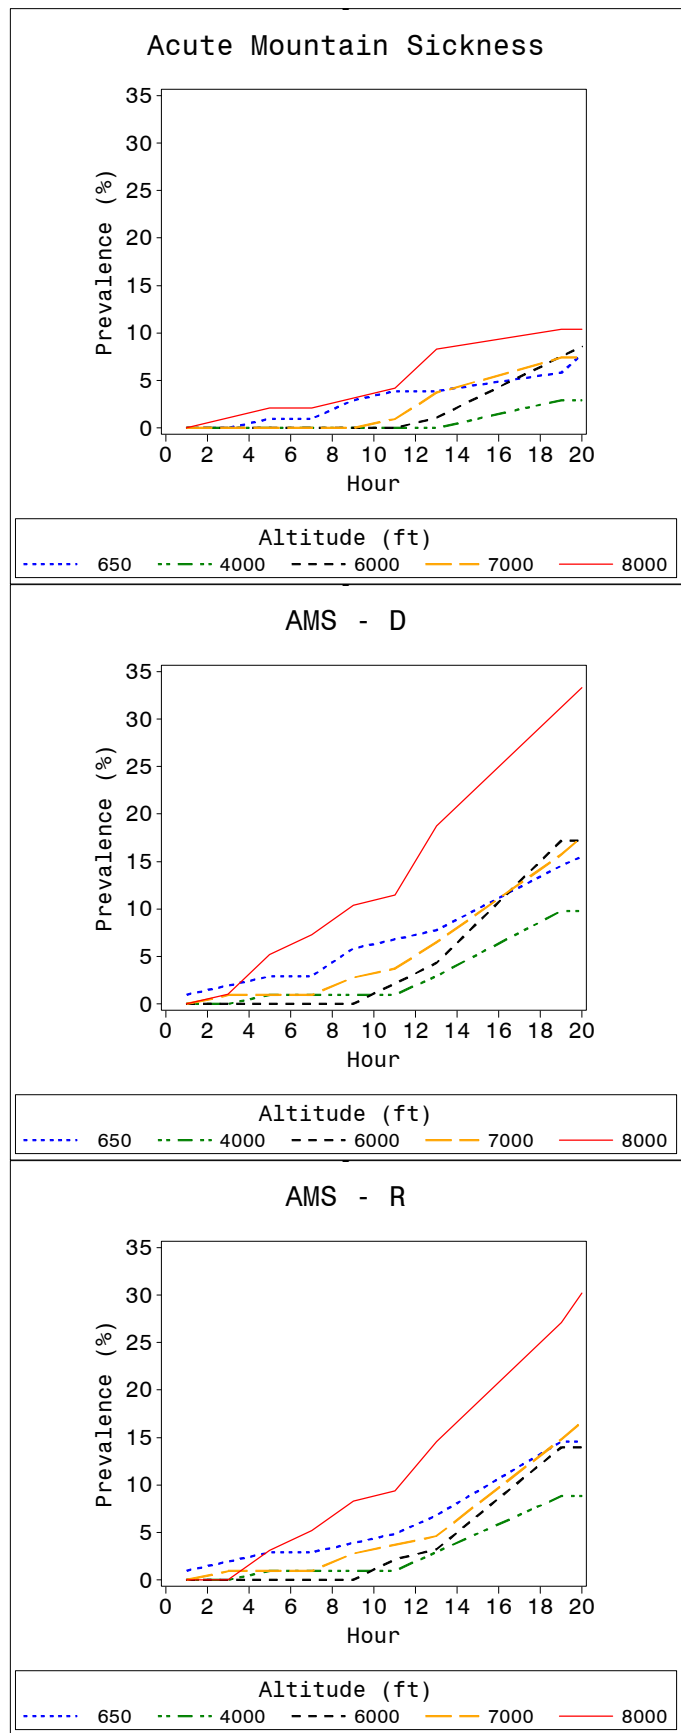

Figure R4: Cumulative Prevalence, Published Criterion Scores

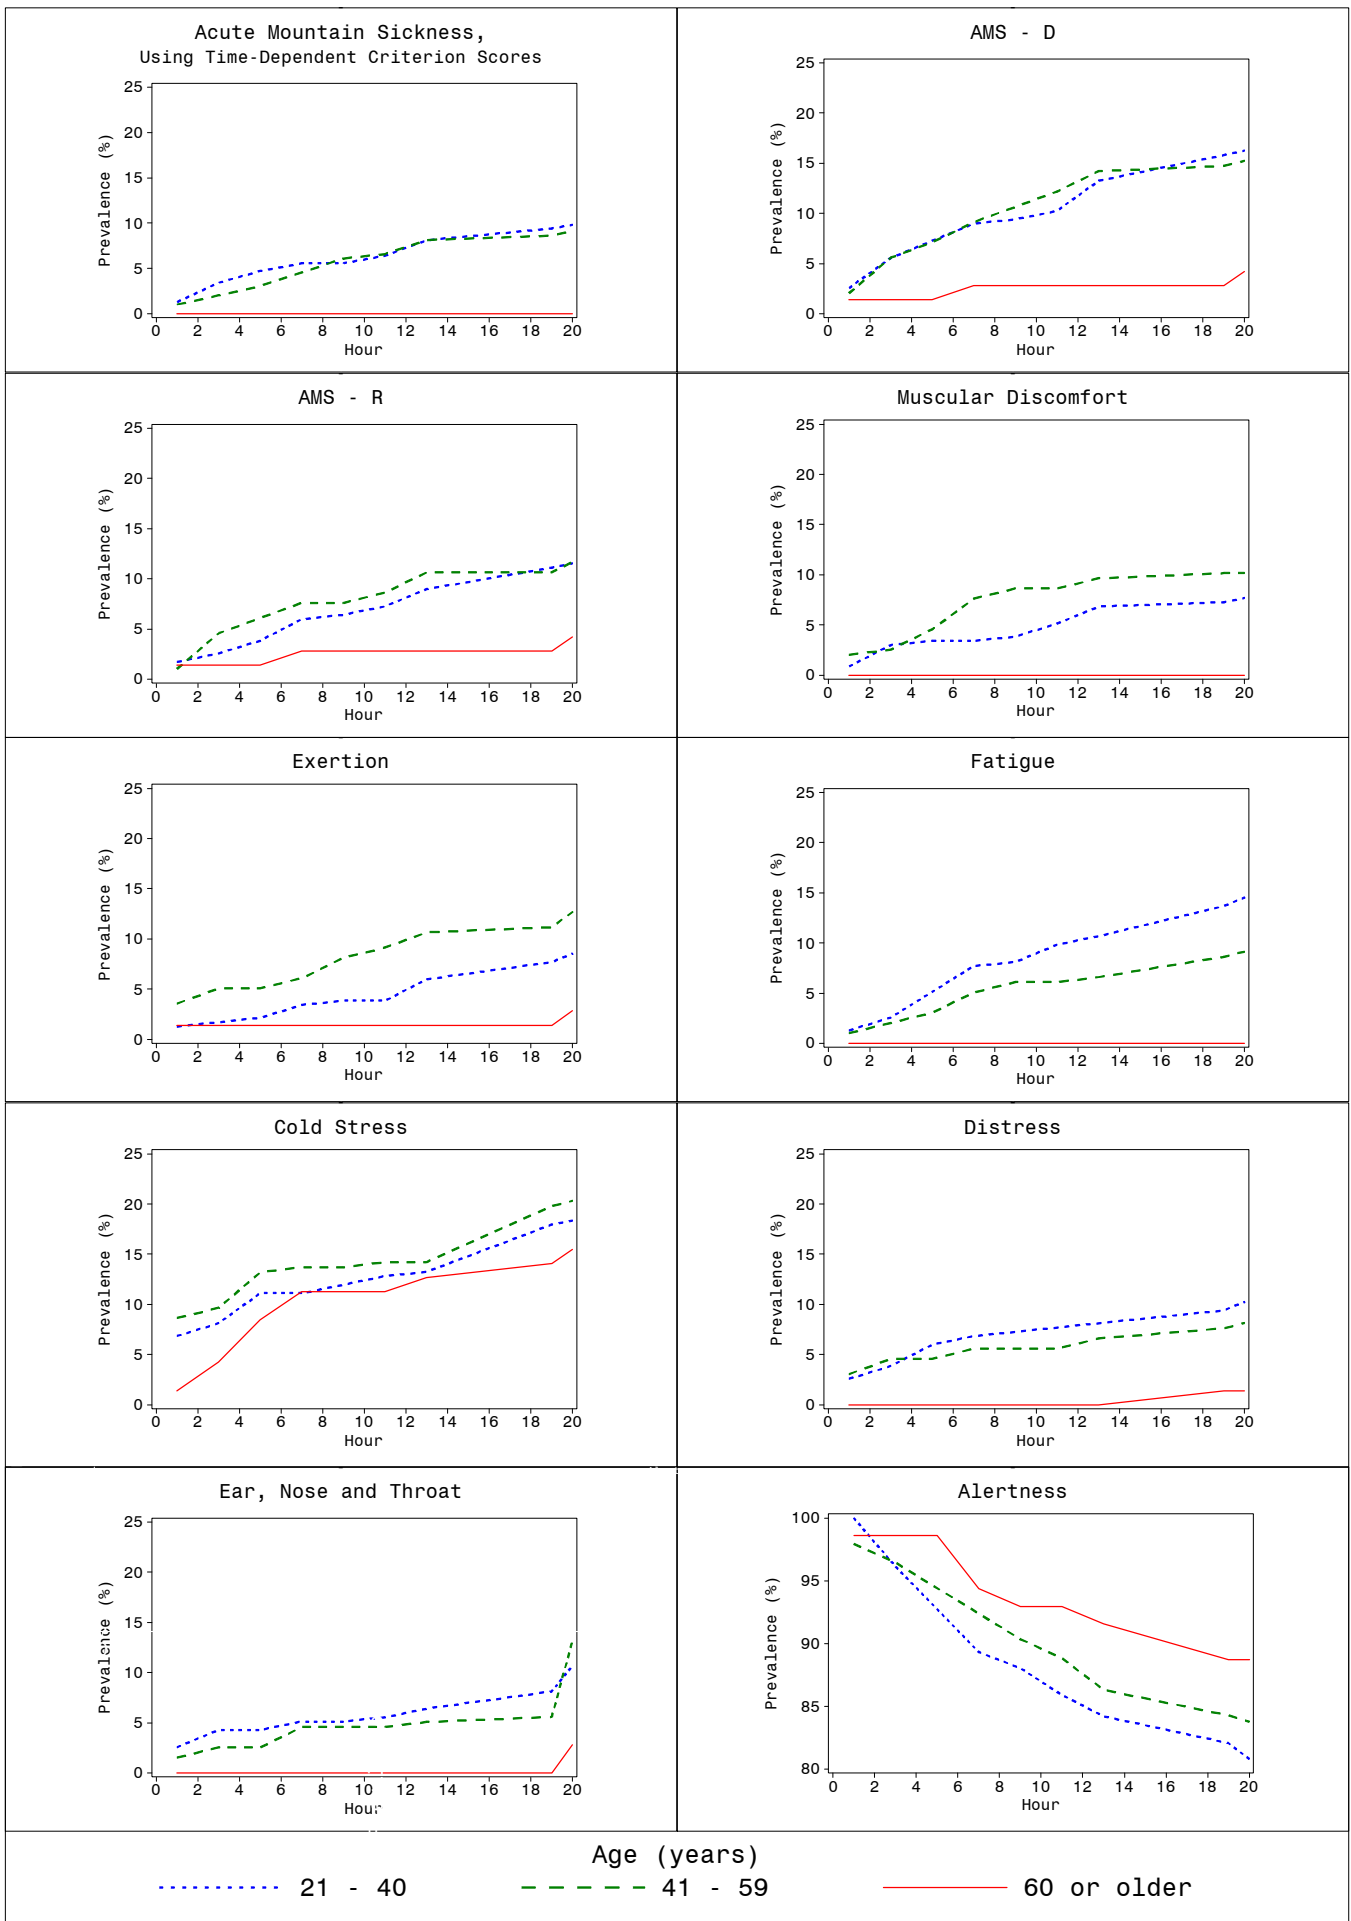

Figure R5: Cumulative Prevalence, Time Dependent Criterion Scores by Age Group
